# Supplementary material
Source: PubMed Central journal article supplement (PMC4792668)
Supplement: NIHMS762114-supplement-2.pdf [file NIHMS762114-supplement-2.pdf]

Table S1: Retention time (RT), peak area, peak height, peak width and theoretical plate numbers, with their standard deviations (SD), of standard lipids detected by LC-MS in negative and positive ion modes using the Accucore C30 column

| Compound                                                              | RT (min) |      |      | Area     |          | Height   |          | Width |      | Number of plates |       |
|-----------------------------------------------------------------------|----------|------|------|----------|----------|----------|----------|-------|------|------------------|-------|
|                                                                       | Mean     | SD   | %SD  | Mean     | SD       | Mean     | SD       | Mean  | SD   | Mean             | SD    |
| <u>Negative ionization mode</u>                                       |          |      |      |          |          |          |          |       |      |                  |       |
| LysoPG(14:0/0:0) + LysoPI(20:4(5Z,8Z,11Z,14Z)/0:0) + LysoPC(14:0/0:0) | 1.55     | 0.01 | 0.58 | 9.01E+09 | 2.83E+08 | 7.26E+08 | 2.75E+07 | 0.93  | 0.02 | 44               | 1     |
| LysoPI(16:0/0:0) + LysoPG (18:1/0:0) + FA(12:0)                       | 2.44     | 0.00 | 0.00 | 6.94E+09 | 2.61E+08 | 6.68E+08 | 3.20E+07 | 0.43  | 0.00 | 515              | 0     |
| LysoPE(18:1/0:0)                                                      | 2.84     | 0.00 | 0.00 | 4.05E+09 | 7.16E+07 | 4.54E+08 | 2.24E+07 | 0.72  | 0.03 | 247              | 17    |
| FA(18:1)                                                              | 5.67     | 0.01 | 0.24 | 6.95E+08 | 2.56E+07 | 1.35E+08 | 6.80E+06 | 0.26  | 0.03 | 7749             | 1859  |
| PC(12:0/12:0)                                                         | 6.21     | 0.00 | 0.00 | 2.25E+09 | 3.73E+07 | 3.37E+08 | 4.03E+06 | 0.29  | 0.01 | 7562             | 504   |
| PE(12:0/12:0)                                                         | 6.61     | 0.00 | 0.00 | 3.34E+09 | 1.17E+08 | 6.59E+08 | 3.66E+07 | 0.27  | 0.00 | 9589             | 0     |
| LysoPC(22:0/0:0)                                                      | 7.17     | 0.00 | 0.00 | 7.29E+08 | 6.13E+07 | 1.20E+08 | 7.77E+06 | 0.24  | 0.00 | 14280            | 0     |
| SM(d18:1/12:0)                                                        | 7.46     | 0.02 | 0.22 | 4.96E+09 | 2.06E+08 | 5.24E+08 | 9.12E+06 | 0.37  | 0.02 | 6602             | 573   |
| PG(14:0/14:0) + PS(14:0/14:0)                                         | 8.38     | 0.02 | 0.25 | 8.31E+09 | 6.67E+08 | 6.80E+08 | 1.91E+07 | 0.65  | 0.02 | 2681             | 147   |
| Cer(d18:1/12:0)                                                       | 8.99     | 0.00 | 0.00 | 2.43E+09 | 1.70E+07 | 3.96E+08 | 9.86E+06 | 0.29  | 0.02 | 15716            | 1846  |
| PE(22:6(4Z,7Z,10Z,13Z,16Z,19Z)/22:6(4Z,7Z,10Z,13Z,16Z,19Z))           | 9.26     | 0.00 | 0.00 | 1.74E+09 | 4.27E+07 | 3.34E+08 | 1.19E+07 | 0.35  | 0.00 | 11200            | 0     |
| PI(16:0/18:1(9Z))                                                     | 11.35    | 0.00 | 0.00 | 1.54E+08 | 1.17E+07 | 2.41E+07 | 2.03E+06 | 0.24  | 0.00 | 35784            | 0     |
| PG(18:1(9Z)/18:1(9Z)) + PS(18:1(9Z)/18:1(9Z))                         | 11.76    | 0.01 | 0.11 | 8.72E+09 | 9.45E+07 | 7.82E+08 | 2.10E+07 | 0.58  | 0.01 | 6624             | 240   |
| PA(18:1(9Z)/18:1(9Z)) + Cer (d18:1/18:1(9Z)) + PC (18:1(9Z)/18:1(9Z)) | 12.39    | 0.01 | 0.07 | 6.75E+09 | 1.02E+08 | 7.36E+08 | 8.78E+06 | 0.53  | 0.00 | 8738             | 13    |
| PE(18:1(9Z)/18:1(9Z))                                                 | 12.86    | 0.01 | 0.10 | 2.19E+09 | 8.62E+07 | 3.03E+08 | 1.79E+07 | 0.30  | 0.00 | 29383            | 61    |
| PC(P-18:0/20:4(5Z,8Z,11Z,14Z))                                        | 13.06    | 0.00 | 0.00 | 1.61E+09 | 5.25E+07 | 3.20E+08 | 1.23E+07 | 0.23  | 0.03 | 54749            | 16480 |
| PC(P-18:0/18:1(9Z))                                                   | 14.54    | 0.00 | 0.00 | 1.82E+09 | 6.26E+07 | 2.88E+08 | 7.10E+06 | 0.33  | 0.02 | 30614            | 3683  |
| FA(26:0)                                                              | 14.86    | 0.00 | 0.00 | 3.05E+08 | 3.52E+07 | 5.83E+07 | 5.32E+06 | 0.18  | 0.03 | 108953           | 28405 |
| PE(P-18:0/18:1(9Z))+ SM (d18:1/24:1(15Z))                             | 15.15    | 0.00 | 0.00 | 5.22E+09 | 1.39E+08 | 5.71E+08 | 2.79E+07 | 0.54  | 0.07 | 13145            | 3637  |
| PC(22:1(13Z)/22:1(13Z))                                               | 17.19    | 0.00 | 0.00 | 1.82E+09 | 1.51E+07 | 3.02E+08 | 6.92E+06 | 0.35  | 0.05 | 41474            | 12022 |
| CL (18:2) <sub>4</sub>                                                | 18.44    | 0.00 | 0.00 | 7.47E+08 | 7.33E+07 | 1.36E+08 | 2.01E+07 | 0.29  | 0.00 | 64691            | 0     |
| CL (18:2) <sub>3</sub> (18:1)                                         | 18.76    | 0.02 | 0.09 | 1.89E+08 | 2.56E+07 | 3.73E+07 | 1.40E+07 | 0.16  | 0.00 | 219914           | 385   |
| CL (18:2) <sub>2</sub> (18:1) <sub>2</sub>                            | 18.91    | 0.06 | 0.30 | 3.08E+08 | 2.67E+07 | 3.53E+07 | 5.12E+06 | 0.34  | 0.02 | 50373            | 4754  |
| <u>Positive ionization mode</u>                                       |          |      |      |          |          |          |          |       |      |                  |       |
| LysoPG(14:0/0:0)                                                      | 1.47     | 0.01 | 0.61 | 4.14E+09 | 4.06E+08 | 9.51E+08 | 5.56E+07 | 0.11  | 0.00 | 2842             | 35    |
| LysoPC(14:0/0:0)                                                      | 1.55     | 0.00 | 0.00 | 1.34E+10 | 1.32E+09 | 2.56E+09 | 9.83E+07 | 0.10  | 0.01 | 3743             | 1265  |
| LysoPI(20:4(5Z,8Z,11Z,14Z)/0:0)                                       | 1.63     | 0.00 | 0.00 | 2.27E+10 | 2.5E+09  | 2.8E+09  | 8.29E+07 | 0.30  | 0.02 | 469              | 49    |
| LysoPI(16:0/0:0) + LysoPG(18:1(9Z)/0:0)                               | 2.44     | 0.01 | 0.37 | 2.51E+10 | 9.27E+08 | 2.09E+09 | 8.10E+07 | 0.50  | 0.04 | 385              | 61    |

Supplemental Tables for “Comprehensive untargeted lipidomic analysis using core-shell C30 particle column and high field orbitrap mass spectrometer”, by Mónica Narváez-Rivas and Qibin Zhang, *Journal of Chromatography A*.

|                                                             |       |      |      |          |          |          |          |      |      |        |       |
|-------------------------------------------------------------|-------|------|------|----------|----------|----------|----------|------|------|--------|-------|
| LysoPE(18:1(9Z)/0:0)                                        | 2.84  | 0.00 | 0.00 | 1.36E+10 | 7.66E+08 | 1.26E+09 | 2.63E+07 | 0.57 | 0.06 | 406    | 93    |
| PC(12:0/12:0)                                               | 6.20  | 0.01 | 0.22 | 2.9E+10  | 5.81E+08 | 2.84E+09 | 3.59E+07 | 0.57 | 0.02 | 1915   | 140   |
| PE(12:0/12:0)                                               | 6.57  | 0.02 | 0.25 | 1.51E+10 | 7.37E+08 | 2.13E+09 | 4.39E+07 | 0.21 | 0.00 | 15670  | 78    |
| DG (12:1(11Z)/12:1(11Z)/0:0)                                | 6.80  | 0.00 | 0.00 | 8.67E+09 | 9.06E+08 | 1.26E+09 | 1.19E+08 | 0.29 | 0.01 | 8606   | 862   |
| LysoPC(22:0/0:0)                                            | 7.17  | 0.00 | 0.06 | 1.24E+10 | 1.41E+09 | 1.64E+09 | 1.96E+08 | 0.28 | 0.04 | 11071  | 2985  |
| SM(d18:1/12:0)                                              | 7.50  | 0.00 | 0.00 | 4.57E+10 | 4.34E+09 | 3.48E+09 | 1.75E+08 | 0.54 | 0.04 | 3126   | 431   |
| PG(14:0/14:0) + PS(14:0/14:0)                               | 8.48  | 0.02 | 0.26 | 3.57E+10 | 3.23E+09 | 1.75E+09 | 2.47E+07 | 0.58 | 0.04 | 3502   | 441   |
| Cer(d18:1/12:0)                                             | 9.01  | 0.01 | 0.12 | 3.18E+10 | 1.44E+09 | 3.49E+09 | 1.06E+08 | 0.33 | 0.04 | 12144  | 3417  |
| PE(22:6(4Z,7Z,10Z,13Z,16Z,19Z)/22:6(4Z,7Z,10Z,13Z,16Z,19Z)) | 9.24  | 0.00 | 0.00 | 2.18E+10 | 5.7E+08  | 2.66E+09 | 3.85E+07 | 0.32 | 0.02 | 13483  | 1811  |
| PI(16:0/18:1(9Z))                                           | 11.34 | 0.02 | 0.14 | 1.59E+09 | 2.18E+08 | 2.21E+08 | 4.69E+07 | 0.19 | 0.02 | 57502  | 13671 |
| PG(18:1(9Z)/18:1(9Z)) + PS(18:1(9Z)/18:1(9Z))               | 11.78 | 0.07 | 0.61 | 3.11E+10 | 6.48E+08 | 1.77E+09 | 4.57E+07 | 0.58 | 0.04 | 6720   | 924   |
| PA(18:1(9Z)/18:1(9Z)) + Cer (d18:1/18:1(9Z))                | 12.37 | 0.00 | 0.00 | 6.8E+10  | 2.61E+09 | 4.88E+09 | 1.73E+08 | 0.54 | 0.01 | 8470   | 396   |
| + PC(18:1(9Z)/18:1(9Z))                                     | 12.85 | 0.00 | 0.00 | 2.01E+10 | 4.55E+08 | 2.03E+09 | 4.33E+07 | 0.27 | 0.00 | 36241  | 0     |
| PE(18:1(9Z)/18:1(9Z))                                       |       | 0.00 |      |          |          |          |          |      |      |        |       |
| PC(P-18:0/20:4(5Z,8Z,11Z,14Z))                              | 13.09 |      | 0.00 | 5.79E+10 | 1.71E+09 | 3.4E+09  | 9.74E+07 | 0.61 | 0.04 | 7522   | 791   |
| + TG (12:1(11Z)/12:1(11Z)/12:1(11Z))                        |       |      |      |          |          |          |          |      |      |        |       |
| DG(14:0/14:0/0:0)                                           | 13.34 | 0.02 | 0.15 | 4.13E+09 | 6.17E+08 | 6.94E+08 | 8.83E+07 | 0.19 | 0.00 | 90025  | 208   |
| PC(P-18:0/18:1(9Z))                                         | 14.51 | 0.00 | 0.00 | 2.6E+10  | 1.59E+09 | 2.62E+09 | 1.45E+08 | 0.40 | 0.00 | 29140  | 0     |
| DG(18:1/18:1/0:0)                                           | 14.87 | 0.02 | 0.15 | 5.23E+09 | 7.92E+08 | 6.01E+08 | 2.70E+07 | 0.22 | 0.02 | 72513  | 16511 |
| PE(P-18:0/18:1(9Z))+ SM(d18:1/24:1(15Z))                    | 15.13 | 0.00 | 0.00 | 3.03E+10 | 7.48E+08 | 2.65E+09 | 7.15E+07 | 0.57 | 0.00 | 11354  | 182   |
| PC(22:1(13Z)/22:1(13Z))                                     | 17.13 | 0.00 | 0.00 | 2.08E+10 | 6.3E+08  | 1.58E+09 | 3.06E+07 | 0.49 | 0.03 | 19687  | 2054  |
| CL(18:2) <sub>4</sub>                                       | 18.47 | 0.00 | 0.00 | 3.58E+09 | 1.09E+09 | 6.6E+08  | 1.15E+08 | 0.15 | 0.02 | 253026 | 56923 |
| TG(14:0/14:0/14:0) + DG (22:1(13Z)/22:1(13Z)/0:0)           | 18.87 | 0.00 | 0.00 | 1.77E+10 | 4.05E+08 | 2.78E+09 | 3.02E+07 | 0.35 | 0.02 | 46932  | 5874  |
| TG(16:0/16:0/16:0)                                          | 20.45 | 0.00 | 0.00 | 2.68E+09 | 3.1E+08  | 6.78E+08 | 7.02E+07 | 0.18 | 0.03 | 221546 | 57026 |
| TG(22:1(13Z)/22:1(13Z)/22:1(13Z))                           | 22.33 | 0.00 | 0.00 | 2.02E+10 | 4.44E+08 | 3.29E+09 | 5.97E+07 | 0.26 | 0.05 | 129294 | 67124 |

Cer: ceramide, CL: cardiolipin, DG: diacylglycerol, FA: fatty acid, LysoPC: lysophosphatidylcholine, LysoPE: lysophosphatidylethanolamine, LysoPG: lysophosphatidylglycerol, LysoPI: lysophosphatidylinositol, PA: phosphatidic acid, PC: phosphatidylcholine, PE: phosphatidylethanolamine, PG: phosphatidylglycerol, PI: phosphatidylinositol, PL: plasmalogen, PS: phosphatidylserine, SM: sphingomyelin, TG: triacylglycerol

Table S2: Retention time (RT), peak area, peak height, peak width and theoretical plate numbers, with their standard deviations (SD), of standard lipids detected by LC-MS in negative and positive ion modes using the Cortecs C18 column

| Compound                                                              | RT (min) |     |     | Area     |          | Height   |          | Width |     | Number of plates |       |
|-----------------------------------------------------------------------|----------|-----|-----|----------|----------|----------|----------|-------|-----|------------------|-------|
|                                                                       | Mean     | SD  | %SD | Mean     | SD       | Mean     | SD       | Mean  | SD  | Mean             | SD    |
|                                                                       | n        |     | D   |          |          |          |          | n     |     |                  |       |
| <u>Negative ionization mode</u>                                       |          |     |     |          |          |          |          |       |     |                  |       |
| LysoPG(14:0/0:0) + LysoPI(20:4(5Z,8Z,11Z,14Z)/0:0) + LysoPC(14:0/0:0) | 1.02     | 0.0 | 0.0 | 9.2E+09  | 7.98E+07 | 9.29E+08 | 2.96E+07 | 0.56  | 0.0 | 52               | 3     |
|                                                                       |          | 0.0 | 0.0 | 6.76E+09 | 1.50E+08 | 7.62E+08 | 2.47E+07 |       | 0.0 |                  |       |
| LysoPI(16:0/0:0) + LysoPG(18:1(9Z)/0:0)                               | 1.61     | 0   | 0   | 9        | 8        | 8        | 7        | 0.37  | 0   | 303              | 0     |
|                                                                       |          | 0.0 | 0.0 | 5.02E+09 | 7.54E+07 | 6.33E+08 | 1.34E+07 |       | 0.0 |                  |       |
| FA(12:0) + LPE(18:1(9Z)/0:0)                                          | 2.11     | 0   | 0   | 9        | 7        | 8        | 7        | 0.59  | 5   | 207              | 35    |
|                                                                       |          | 0.0 | 0.2 | 4.02E+09 | 1.01E+08 | 7.27E+08 | 2.39E+07 |       | 0.0 |                  |       |
| FA(18:1(9Z))                                                          | 4.91     | 1   | 7   | 8        | 7        | 7        | 6        | 0.27  | 0   | 5365             | 180   |
|                                                                       |          | 0.0 | 0.0 | 2.32E+09 | 2.90E+07 | 3.69E+08 | 8.37E+06 |       | 0.0 |                  |       |
| PC(12:0/12:0)                                                         | 5.41     | 0   | 0   | 9        | 7        | 8        | 6        | 0.39  | 4   | 3128             | 655   |
|                                                                       |          | 0.0 | 0.0 | 3.61E+09 | 6.94E+07 | 3.48E+08 | 7.46E+06 |       | 0.0 |                  |       |
| PE(12:0/12:0)                                                         | 5.97     | 0   | 0   | 9        | 7        | 8        | 6        | 0.52  | 1   | 2128             | 89    |
|                                                                       |          | 0.0 | 0.0 | 2.06E+09 | 2.25E+07 | 3.69E+08 | 5.94E+06 |       | 0.0 |                  |       |
| LysoPC(22:0/0:0)                                                      | 6.37     | 0   | 0   | 9        | 7        | 8        | 6        | 0.39  | 1   | 4233             | 240   |
|                                                                       |          | 0.0 | 0.0 | 3.78E+09 | 2.77E+07 | 6.09E+08 | 1.49E+06 |       | 0.0 |                  |       |
| SM(d18:1/12:0)                                                        | 6.80     | 0   | 0   | 9        | 7        | 8        | 7        | 0.44  | 1   | 3862             | 190   |
|                                                                       |          | 0.0 | 0.2 | 7.25E+09 | 5.04E+07 | 6.62E+08 | 2.53E+06 |       | 0.0 |                  |       |
| PG(14:0/14:0) + PS(14:0/14:0)                                         | 7.35     | 2   | 2   | 9        | 7        | 8        | 7        | 0.83  | 3   | 1264             | 92    |
| PE(22:6(4Z,7Z,10Z,13Z,16Z,19Z)/22:6(4Z,7Z,10Z,13Z,16Z,19Z))           | 8.27     | 0   | 0   | 9        | 7        | 8        | 7        | 0.37  | 4   | 8330             | 1348  |
|                                                                       |          | 0.0 | 0.0 | 2.45E+09 | 2.58E+07 | 4.53E+08 | 1.18E+06 |       | 0.0 |                  |       |
| Cer(d18:1/12:0)                                                       | 8.54     | 0   | 0   | 9        | 7        | 8        | 7        | 0.27  | 3   | 16429            | 3496  |
|                                                                       |          | 0.0 | 0.0 |          | 1.01E+08 | 4.88E+08 | 1.63E+06 |       | 0.0 |                  |       |
| PI(16:0/18:1(9Z))                                                     | 9.96     | 0   | 0   | 2.4E+08  | 7        | 7        | 6        | 0.20  | 3   | 41625            | 13852 |
|                                                                       | 10.2     | 0.0 | 0.0 | 6.19E+09 | 4.99E+07 | 5.75E+08 | 2.87E+06 |       | 0.0 |                  |       |
| PG(18:1(9Z)/18:1(9Z)) + PS(18:1(9Z)/18:1(9Z))                         | 5        | 0   | 0   | 9        | 7        | 8        | 7        | 0.75  | 4   | 3038             | 290   |
|                                                                       | 11.1     | 0.0 | 0.0 | 3.01E+09 | 3.38E+07 |          | 7.03E+06 |       | 0.0 |                  |       |
| PA(18:1(9Z)/18:1(9Z))                                                 | 4        | 0   | 0   | 9        | 7        | 3.5E+08  | 6        | 0.38  | 3   | 13867            | 2433  |

Supplemental Tables for “Comprehensive untargeted lipidomic analysis using core-shell C30 particle column and high field orbitrap mass spectrometer”, by Mónica Narváez-Rivas and Qibin Zhang, *Journal of Chromatography A*.

|                                                                             |      |     |     |         |         |         |         |      |     |       |      |
|-----------------------------------------------------------------------------|------|-----|-----|---------|---------|---------|---------|------|-----|-------|------|
| PC (18:1/18:1)                                                              | 11.3 | 0.0 | 0.0 | 2.19E+0 | 8.14E+0 | 3.39E+0 | 7.86E+0 | 0.0  | 0.0 | 18603 | 2735 |
| PC(P-18:0/20:4(5Z,8Z,11Z,14Z) + Cer(d18:1/18:1(9Z)) + PE(18:1(9Z)/18:1(9Z)) | 2    | 0   | 0   | 9       | 7       | 8       | 6       | 0.33 | 2   |       |      |
|                                                                             | 11.8 | 0.0 | 0.0 | 9.11E+0 | 1.83E+0 | 7.9E+08 | 2.92E+0 | 0.65 | 0.0 | 5390  | 1139 |
|                                                                             | 1    | 0   | 0   | 9       | 8       | 7       | 7       |      | 7   |       |      |
| FA(26:0)                                                                    | 13.1 | 0.0 | 0.1 |         | 7.71E+0 | 7.12E+0 | 3.06E+0 |      | 0.0 | 16406 |      |
|                                                                             | 6    | 1   | 0   | 3.4E+08 | 6       | 7       | 6       | 0.13 | 0   | 3     | 334  |
| PC(P-18:0/18:1(9Z))                                                         | 13.3 | 0.0 | 0.0 | 1.59E+0 | 1.65E+0 | 2.78E+0 | 6.30E+0 |      | 0.0 |       |      |
|                                                                             | 0    | 0   | 0   | 9       | 7       | 8       | 6       | 0.30 | 3   | 31254 | 5564 |
| PE(P-18:0/18:1(9Z))+ SM(d18:1/24:1(15Z))                                    | 13.9 | 0.0 | 0.0 | 4.49E+0 | 3.71E+0 | 4.76E+0 | 2.10E+0 |      | 0.0 |       |      |
|                                                                             | 7    | 0   | 0   | 9       | 7       | 8       | 7       | 0.67 | 5   | 7062  | 1095 |
| PC(22:1(13Z)/22:1(13Z))                                                     | 16.0 | 0.0 | 0.0 | 1.73E+0 | 3.69E+0 | 3.08E+0 | 9.72E+0 |      | 0.0 |       |      |
|                                                                             | 4    | 0   | 0   | 9       | 7       | 8       | 6       | 0.35 | 3   | 34299 | 5777 |
| CL(18:2) <sub>4</sub>                                                       | 17.5 | 0.0 | 0.0 | 1.24E+0 | 3.52E+0 | 2.05E+0 | 8.77E+0 |      | 0.0 |       |      |
|                                                                             | 1    | 0   | 0   | 9       | 7       | 8       | 6       | 0.38 | 1   | 34799 | 2314 |
| CL(18:2) <sub>3</sub> (18:1)                                                | 17.7 | 0.0 | 0.0 | 8.94E+0 | 3.64E+0 | 2.23E+0 | 1.31E+0 |      | 0.0 | 78765 |      |
|                                                                             | 5    | 0   | 0   | 7       | 6       | 7       | 6       | 0.08 | 0   | 6     | 0    |
| CL(18:2) <sub>2</sub> (18:1) <sub>2</sub>                                   | 17.8 | 0.0 | 0.0 |         | 1.61E+0 | 4.69E+0 | 2.26E+0 |      | 0.0 |       |      |
|                                                                             | 7    | 1   | 6   | 3.6E+08 | 7       | 7       | 6       | 0.30 | 0   | 56784 | 70   |
| <u>Positive ionization mode</u>                                             |      |     |     |         |         |         |         |      |     |       |      |
| LysoPG(14:0/0:0)                                                            | 1.04 | 0.0 | 0.8 | 1.83E+1 | 7.11E+0 | 2.25E+0 | 9.01E+0 |      | 0.0 |       |      |
|                                                                             |      | 1   | 6   | 0       | 8       | 9       | 7       | 0.22 | 0   | 355   | 6    |
| LysoPI(20:4(5Z,8Z,11Z,14Z)/0:0) + LysoPC(14:0/0:0)                          | 1.15 | 0.0 | 0.0 | 2.28E+1 | 8.45E+0 | 2.7E+09 | 6.65E+0 |      | 0.0 |       |      |
|                                                                             |      | 0   | 0   | 0       | 8       | 7       | 7       | 0.34 | 2   | 186   | 19   |
| LysoPI(16:0/0:0) + LysoPG(18:1(9Z)/0:0)                                     | 1.61 | 0.0 | 0.0 | 2.13E+1 |         | 2.13E+0 | 6.46E+0 |      | 0.0 |       |      |
|                                                                             |      | 0   | 0   | 0       | 6.9E+08 | 9       | 7       | 0.39 | 2   | 277   | 24   |
| LysoPE(18:1(9Z)/0:0)                                                        | 2.07 | 0.0 | 0.6 | 1.29E+1 | 5.23E+0 | 1.16E+0 | 4.42E+0 |      | 0.0 |       |      |
|                                                                             |      | 1   | 5   | 0       | 8       | 9       | 7       | 0.54 | 3   | 236   | 27   |
| PC(12:0/12:0)                                                               | 5.41 | 0.0 | 0.0 | 2.47E+1 | 7.69E+0 | 2.95E+0 | 1.20E+0 |      | 0.0 |       |      |
|                                                                             |      | 0   | 0   | 0       | 8       | 9       | 8       | 0.47 | 1   | 2141  | 99   |
| PE(12:0/12:0)                                                               | 5.96 | 0.0 | 0.2 | 1.68E+1 | 7.44E+0 | 2.02E+0 | 7.51E+0 |      | 0.0 |       |      |
|                                                                             |      | 2   | 8   | 0       | 8       | 9       | 7       | 0.25 | 1   | 8985  | 792  |
| DG(12:1(11Z)/12:1(11Z)/0:0)                                                 | 6.08 | 0.0 | 0.0 |         |         | 1.87E+0 | 4.20E+0 |      | 0.0 |       |      |
|                                                                             |      | 0   | 0   | 1.4E+10 | 3.9E+08 | 9       | 7       | 0.24 | 0   | 10268 | 0    |
| LysoPC(22:0/0:0)                                                            | 6.35 | 0.0 | 0.1 | 2.23E+1 | 5.27E+0 |         | 7.36E+0 |      | 0.0 |       |      |
|                                                                             |      | 1   | 4   | 0       | 8       | 2.6E+09 | 7       | 0.41 | 2   | 3899  | 354  |
| SM(d18:1/12:0)                                                              | 6.79 | 0.0 | 0.2 | 2.42E+1 | 1.35E+0 |         | 1.34E+0 |      | 0.0 |       |      |
|                                                                             |      | 2   | 4   | 0       | 9       | 2.7E+09 | 8       | 0.41 | 7   | 4816  | 1854 |

Supplemental Tables for “Comprehensive untargeted lipidomic analysis using core-shell C30 particle column and high field orbitrap mass spectrometer”, by Mónica Narváez-Rivas and Qibin Zhang, *Journal of Chromatography A*.

|                                                             |      |     |     |         |         |         |         |      |   |       |       |
|-------------------------------------------------------------|------|-----|-----|---------|---------|---------|---------|------|---|-------|-------|
| PG(14:0/14:0) + PS(14:0/14:0)                               | 7.38 | 0.0 | 0.6 | 3.05E+1 | 7.61E+0 | 1.72E+0 | 4.63E+0 | 0.57 | 1 | 2723  | 135   |
| PE(22:6(4Z,7Z,10Z,13Z,16Z,19Z)/22:6(4Z,7Z,10Z,13Z,16Z,19Z)) | 8.25 | 0.0 | 0.0 | 2.05E+1 | 5.43E+0 | 2.68E+0 | 9.37E+0 | 0.35 | 3 | 9214  | 1352  |
| Cer(d18:1/12:0)                                             | 8.56 | 0.0 | 0.2 | 2.68E+1 | 5.18E+0 | 3.42E+0 | 7.60E+0 | 0.31 | 2 | 12367 | 2098  |
| PI(16:0/18:1(9Z))                                           | 9.95 | 0.0 | 0.1 | 2.21E+0 | 1.26E+0 |         | 1.95E+0 | 0.18 | 2 | 49511 | 11695 |
| PG(18:1(9Z)/18:1(9Z)) + PS(18:1(9Z)/18:1(9Z))               | 10.2 | 0.0 | 0.2 | 3.32E+1 | 8.26E+0 | 1.77E+0 | 3.96E+0 | 0.52 | 2 | 6323  | 433   |
| PA(18:1(9Z)/18:1(9Z))                                       | 8    | 0.0 | 0.2 | 1.47E+1 | 3.63E+0 | 1.38E+0 | 5.97E+0 | 0.29 | 2 | 23076 | 3495  |
| PC(18:1(9Z)/18:1(9Z))                                       | 11.3 | 0.0 | 0.0 | 3.99E+1 | 1.19E+0 | 3.09E+0 | 9.23E+0 | 0.43 | 0 | 11081 | 18    |
| Cer(d18:1/18:1(9Z)) + PE(18:1(9Z)/18:1(9Z))                 | 2    | 0.0 | 0.0 | 6.14E+1 | 1.78E+0 | 4.43E+0 | 1.78E+0 | 0.50 | 1 | 9202  | 344   |
| PC(P-18:0/20:4(5Z,8Z,11Z,14Z))                              | 9    | 0.0 | 0.0 | 8.77E+0 | 3.06E+0 | 1.48E+0 | 4.73E+0 | 0.18 | 1 | 70563 | 11962 |
| TG(12:1(11Z)/12:1(11Z)/12:1(11Z))                           | 12.3 | 0.0 | 0.1 | 3.61E+1 | 7.43E+0 | 2.68E+0 | 7.38E+0 | 0.63 | 2 | 6200  | 466   |
| PC(P-18:0/18:1(9Z))                                         | 8    | 0.0 | 0.1 | 2.42E+1 | 8.42E+0 | 2.54E+0 | 8.18E+0 | 0.43 | 4 | 15348 | 2572  |
| PE(P-18:0/18:1(9Z)) + SM (d18:1/24:1(15Z))                  | 13.9 | 0.0 | 0.0 |         | 9.11E+0 | 2.48E+0 | 7.65E+0 | 0.49 | 1 | 12769 | 446   |
| DG(18:1(9Z)/18:1(9Z)/0:0)                                   | 5    | 0.0 | 0.0 | 2.7E+10 | 8       | 9       | 7       | 0.20 | 2 | 83867 | 15129 |
| PC(22:1(13Z)/22:1(13Z))                                     | 14.3 | 0.0 | 0.0 | 3.07E+0 | 1.43E+0 | 5.27E+0 | 3.59E+0 | 0.36 | 3 | 32709 | 4080  |
| CL(18:2)4                                                   | 16.0 | 0.0 | 0.0 | 1.93E+1 | 8.17E+0 | 1.49E+0 | 3.17E+0 | 0.31 | 1 | 49991 | 4662  |
| DG(22:1(13Z)/22:1(13Z)/0:0)                                 | 17.5 | 0.0 | 0.0 | 7.72E+0 | 3.56E+0 | 9.26E+0 | 1.00E+0 | 0.30 | 1 | 58124 | 4818  |
| TG(14:0/14:0/14:0)                                          | 17.8 | 0.0 | 0.0 | 5.93E+0 | 4.31E+0 | 1.01E+0 | 4.70E+0 | 0.28 | 2 | 66496 | 7477  |
| TG(16:0/16:0/16:0)                                          | 0    | 0.0 | 0.3 | 9       | 8       | 9       | 7       | 0.21 | 7 | 7     | 3     |
| TG(22:1(13Z)/22:1(13Z)/22:1(13Z))                           | 18.1 | 0.0 | 0.0 | 1.42E+1 | 6.33E+0 | 2.41E+0 | 8.46E+0 | 0.23 | 1 | 7     | 14807 |
|                                                             | 19.5 | 0.0 | 0.0 | 4.59E+0 | 8.53E+0 |         | 6.16E+0 |      |   | 18121 | 12203 |
|                                                             | 3    | 0.0 | 0.0 | 9       | 8       | 1E+09   | 8       |      |   | 14013 |       |
|                                                             | 21.0 | 0.0 | 0.0 | 1.75E+1 | 7.98E+0 | 3.42E+0 | 8.21E+0 |      |   |       |       |
|                                                             | 7    | 0.0 | 0.0 | 0       | 8       | 9       | 7       |      |   |       |       |

Supplemental Tables for “Comprehensive untargeted lipidomic analysis using core-shell C30 particle column and high field orbitrap mass spectrometer”, by Mónica Narváez-Rivas and Qibin Zhang, *Journal of Chromatography A*.

Cer: ceramide, CL: cardiolipin, DG: diacylglycerol, FA: fatty acid, LysoPC: lysophosphatidylcholine, LysoPE: lysophosphatidylethanolamine, LysoPG: lysophosphatidylglycerol, LysoPI: lysophosphatidylinositol, PA: phosphatidic acid, PC: phosphatidylcholine, PE: phosphatidylethanolamine, PG: phosphatidylglycerol, PI: phosphatidylinositol, PL: plasmalogen, PS: phosphatidylserine, SM: sphingomyelin, TG: triacylglycerol

Table S3: Retention time (RT), peak area, peak height, peak width and theoretical plate numbers, with their standard deviations (SD), of standard lipids detected by LC-MS in negative and positive ion modes using the HSST3 column

| Compound                                                                   | RT (min) |      |      | Area     |          | Height   |          | Width |      | Number of plates |       |
|----------------------------------------------------------------------------|----------|------|------|----------|----------|----------|----------|-------|------|------------------|-------|
|                                                                            | Mean     | SD   | %SD  | Mean     | SD       | Mean     | SD       | Mean  | SD   | MEAN             | SD    |
| <u>Negative ionization mode</u>                                            |          |      |      |          |          |          |          |       |      |                  |       |
| LysoPG(14:0/0:0) + LysoPI(20:4(5Z,8Z,11Z,14Z)/0:0)                         | 1.53     | 0.00 | 0.00 | 6.91E+09 | 2.47E+08 | 8.82E+08 | 3.81E+07 | 0.29  | 0.00 | 445              | 0     |
| LysoPC(14:0/0:0)                                                           | 1.71     | 0.01 | 0.52 | 2.32E+09 | 1.35E+08 | 3.5E+08  | 1.53E+07 | 0.32  | 0.06 | 509              | 245   |
| LysoPI(16:0/0:0) + LysoPG(18:1(9Z)/0:0)                                    | 2.54     | 0.01 | 0.35 | 6.67E+09 | 3.47E+08 | 6.87E+08 | 4.64E+07 | 0.51  | 0.04 | 396              | 62    |
| FA(12:0) + LPE(18:1(9Z)/0:0)                                               | 3.19     | 0.00 | 0.00 | 4.98E+09 | 1.36E+08 | 5.83E+08 | 1.47E+07 | 0.65  | 0.08 | 393              | 82    |
| PC(12:0/12:0) + FA (18:1(9Z))                                              | 6.67     | 0.01 | 0.13 | 2.19E+09 | 7.73E+07 | 3.65E+08 | 1.91E+07 | 0.32  | 0.05 | 7228             | 2370  |
| PE(12:0/12:0)                                                              | 7.04     | 0.00 | 0.00 | 2.75E+09 | 3.61E+07 | 3.85E+08 | 1.84E+07 | 0.37  | 0.00 | 5792             | 0     |
| LysoPC(22:0/0:0)                                                           | 7.69     | 0.02 | 0.21 | 2.96E+09 | 4.32E+07 | 3.04E+08 | 8.89E+06 | 0.54  | 0.00 | 3246             | 14    |
| SM(d18:1/12:0)                                                             | 7.94     | 0.02 | 0.21 | 3.99E+09 | 6.95E+07 | 5.23E+08 | 1.87E+07 | 0.46  | 0.02 | 4737             | 318   |
| PS(14:0/14:0)                                                              | 8.46     | 0.00 | 0.00 | 3.62E+09 | 6.28E+07 | 6.9E+08  | 2.02E+07 | 0.23  | 0.02 | 22315            | 3333  |
| PG(14:0/14:0)                                                              | 8.62     | 0.00 | 0.00 | 6.67E+09 | 7.31E+07 | 6.63E+08 | 1.57E+07 | 0.48  | 0.03 | 5178             | 759   |
| PE(22:6(4Z,7Z,10Z,13Z,16Z,19Z)/22:6(4Z,7Z,10Z,13Z,16Z,19Z))                | 9.78     | 0.01 | 0.14 | 1.88E+09 | 4.11E+07 | 3.14E+08 | 3.37E+06 | 0.28  | 0.03 | 20492            | 3898  |
| Cer(d18:1/12:0)                                                            | 9.99     | 0.00 | 0.00 | 3.61E+09 | 5.74E+07 | 4.14E+08 | 1.08E+07 | 0.41  | 0.01 | 9711             | 601   |
| PI(16:0/18:1(9Z))                                                          | 11.39    | 0.01 | 0.10 | 3.13E+08 | 9.93E+06 | 4.88E+07 | 1.05E+06 | 0.32  | 0.05 | 21749            | 8318  |
| PG(18:1(9Z)/18:1(9Z)) + PS(18:1(9Z)/18:1(9Z))                              | 11.83    | 0.01 | 0.08 | 6.89E+09 | 1.23E+08 | 6.26E+08 | 2.35E+07 | 0.88  | 0.04 | 2928             | 241   |
| PA(18:1(9Z)/18:1(9Z)) + PC(18:1(9Z)/18:1(9Z))                              | 12.72    | 0.00 | 0.00 | 6.11E+09 | 1.44E+08 | 4.04E+08 | 1.43E+07 | 0.63  | 0.01 | 6613             | 283   |
| PC(P-18:0/20:4(5Z,8Z,11Z,14Z)+ Cer(d18:1/18:1(9Z)) + PE(18:1(9Z)/18:1(9Z)) | 13.33    | 0.00 | 0.00 | 1.02E+10 | 1.84E+08 | 8.54E+08 | 1.81E+07 | 0.79  | 0.01 | 4513             | 153   |
| PC(P-18:0/18:1(9Z))                                                        | 14.74    | 0.01 | 0.09 | 2.02E+09 | 8.22E+07 | 2.63E+08 | 1.32E+07 | 0.42  | 0.07 | 21429            | 6558  |
| PE(P-18:0/18:1(9Z))+ SM(d18:1/24:1(15Z)) + FA(26:0)                        | 15.37    | 0.00 | 0.00 | 5.05E+09 | 6.57E+07 | 5.82E+08 | 1.64E+07 | 0.57  | 0.05 | 11908            | 1987  |
| PC(22:1(13Z)/22:1(13Z))                                                    | 17.13    | 0.01 | 0.05 | 1.87E+09 | 2.36E+07 | 2.74E+08 | 6.68E+06 | 0.45  | 0.03 | 23724            | 3779  |
| CL(18:2) <sub>4</sub>                                                      | 18.23    | 0.00 | 0.00 | 1.38E+09 | 6.51E+07 | 2.14E+08 | 1.16E+07 | 0.35  | 0.02 | 43803            | 5482  |
| CL(18:2) <sub>3</sub> (18:1)                                               | 18.55    | 0.00 | 0.00 | 2.89E+08 | 5.21E+07 | 3.69E+07 | 3.82E+06 | 0.24  | 0.02 | 93707            | 13884 |
| CL(18:2) <sub>2</sub> (18:1) <sub>2</sub>                                  | 18.87    | 0.02 | 0.11 | 2.67E+08 | 4.20E+07 | 2.74E+07 | 3.48E+06 | 0.27  | 0.00 | 78135            | 170   |
| <u>Positive ionization mode</u>                                            |          |      |      |          |          |          |          |       |      |                  |       |
| LysoPG(14:0/0:0) + LysoPI(20:4(5Z,8Z,11Z,14Z)/0:0)                         | 1.55     | 0.00 | 0.00 | 1.92E+10 | 2.66E+09 | 2.23E+09 | 1.61E+08 | 0.29  | 0.02 | 467              | 97    |
| LysoPC(14:0/0:0)                                                           | 1.70     | 0.01 | 0.59 | 2.19E+10 | 2.95E+09 | 2.55E+09 | 1.67E+08 | 0.46  | 0.08 | 222              | 71    |
| LysoPI(16:0/0:0) + LysoPG(18:1(9Z)/0:0)                                    | 2.53     | 0.01 | 0.46 | 2.02E+10 | 3.69E+09 | 1.98E+09 | 1.73E+08 | 0.52  | 0.08 | 396              | 166   |
| LysoPE(18:1(9Z)/0:0)                                                       | 3.13     | 0.00 | 0.00 | 1.19E+10 | 2.12E+09 | 1.14E+09 | 9.96E+07 | 0.48  | 0.00 | 680              | 0     |

Supplemental Tables for “Comprehensive untargeted lipidomic analysis using core-shell C30 particle column and high field orbitrap mass spectrometer”, by Mónica Narváez-Rivas and Qibin Zhang, *Journal of Chromatography A*.

|                                                                            |       |      |      |          |          |          |          |      |      |        |       |
|----------------------------------------------------------------------------|-------|------|------|----------|----------|----------|----------|------|------|--------|-------|
| PC(12:0/12:0)                                                              | 6.66  | 0.02 | 0.23 | 2.5E+10  | 1.08E+09 | 3.01E+09 | 8.69E+07 | 0.33 | 0.02 | 6554   | 689   |
| PE(12:0/12:0)                                                              | 7.05  | 0.02 | 0.21 | 1.6E+10  | 1.27E+09 | 2.09E+09 | 1.56E+07 | 0.26 | 0.03 | 13246  | 4101  |
| DG(12:1(11Z)/12:1(11Z)/0:0)                                                | 7.36  | 0.00 | 0.00 | 1.09E+10 | 3.16E+09 | 1.41E+09 | 1.56E+08 | 0.27 | 0.06 | 12142  | 5032  |
| LysoPC(22:0/0:0)                                                           | 7.68  | 0.00 | 0.00 | 2.01E+10 | 1.19E+09 | 2.38E+09 | 8.92E+07 | 0.28 | 0.03 | 12452  | 3405  |
| SM(d18:1/12:0)                                                             | 7.93  | 0.02 | 0.19 | 2.5E+10  | 1.67E+09 | 2.51E+09 | 1.22E+08 | 0.45 | 0.11 | 4106   | 462   |
| PS(14:0/14:0)                                                              | 8.45  | 0.02 | 0.18 | 4.89E+09 | 5.87E+08 | 8.8E+08  | 1.47E+08 | 0.19 | 0.02 | 33296  | 10651 |
| PG(14:0/14:0)                                                              | 8.63  | 0.07 | 0.78 | 2.64E+10 | 2.17E+09 | 1.64E+09 | 3.06E+07 | 0.50 | 0.10 | 5038   | 1824  |
| PE(22:6(4Z,7Z,10Z,13Z,16Z,19Z)/22:6(4Z,7Z,10Z,13Z,16Z,19Z))                | 9.77  | 0.00 | 0.00 | 2.11E+10 | 1.57E+09 | 2.52E+09 | 4.91E+07 | 0.31 | 0.03 | 16111  | 4366  |
| Cer(d18:1/12:0)                                                            | 9.99  | 0.02 | 0.24 | 3.52E+10 | 1.86E+09 | 3.3E+09  | 9.36E+07 | 0.35 | 0.02 | 13426  | 2037  |
| PI(16:0/18:1(9Z))                                                          | 11.39 | 0.01 | 0.10 | 2.1E+09  | 4.42E+08 | 3.61E+08 | 8.35E+07 | 0.26 | 0.03 | 27195  | 2215  |
| PG(18:1(9Z)/18:1(9Z)) + PS(18:1(9Z)/18:1(9Z))                              | 11.86 | 0.05 | 0.40 | 2.95E+10 | 3.36E+09 | 1.66E+09 | 3.31E+07 | 0.57 | 0.03 | 7378   | 332   |
| DG(14:0/14:0/0:0)                                                          | 12.24 | 0.01 | 0.12 | 4.66E+09 | 9.31E+08 | 7.1E+08  | 1.41E+08 | 0.27 | 0.01 | 32882  | 93    |
| PA(18:1(9Z)/18:1(9Z))                                                      | 12.57 | 0.03 | 0.20 | 1.37E+10 | 1.9E+09  | 1.43E+09 | 8.71E+07 | 0.25 | 0.01 | 43844  | 201   |
| PC(18:1(9Z)/18:1(9Z))                                                      | 12.77 | 0.00 | 0.00 | 4.22E+10 | 3.12E+09 | 2.96E+09 | 9.69E+07 | 0.41 | 0.01 | 15575  | 1268  |
| PC(P-18:0/20:4(5Z,8Z,11Z,14Z)+ Cer(d18:1/18:1(9Z)) + PE(18:1(9Z)/18:1(9Z)) | 13.43 | 0.02 | 0.13 | 6.93E+10 | 4.43E+09 | 4.13E+09 | 2.03E+08 | 0.66 | 0.01 | 6419   | 17    |
| TG(12:1(11Z)/12:1(11Z)/12:1(11Z))                                          | 14.19 | 0.02 | 0.17 | 3.98E+10 | 3.15E+09 | 2.77E+09 | 8.88E+07 | 0.45 | 0.01 | 15983  | 1312  |
| DG(18:1(9Z)/18:1(9Z)/0:0)                                                  | 14.53 | 0.01 | 0.10 | 3.09E+09 | 6.32E+08 | 4.05E+08 | 7.27E+07 | 0.16 | 0.00 | 131951 | 314   |
| PC(P-18:0/18:1(9Z))                                                        | 14.74 | 0.01 | 0.10 | 2.78E+10 | 2.3E+09  | 2.37E+09 | 1.28E+08 | 0.47 | 0.02 | 16473  | 1182  |
| PE(P-18:0/18:1(9Z))+ SM(d18:1/24:1(15Z))                                   | 15.37 | 0.00 | 0.00 | 2.69E+10 | 2.48E+09 | 2.44E+09 | 1.73E+08 | 0.51 | 0.03 | 14829  | 1740  |
| PC(22:1(13Z)/22:1(13Z))                                                    | 17.07 | 0.02 | 0.10 | 2.08E+10 | 1.13E+09 | 1.47E+09 | 8.10E+07 | 0.55 | 0.07 | 16396  | 4782  |
| CL(18:2) <sub>4</sub>                                                      | 18.26 | 0.03 | 0.16 | 9.35E+09 | 1.44E+09 | 8.77E+08 | 9.30E+07 | 0.38 | 0.03 | 37425  | 5943  |
| CL(18:2) <sub>3</sub> (18:1)                                               | 18.57 | 0.03 | 0.16 | 2.21E+09 | 5.15E+08 | 2.78E+08 | 5.25E+07 | 0.18 | 0.01 | 170294 | 636   |
| DG(22:1(13Z)/22:1(13Z)/0:0)                                                | 18.78 | 0.01 | 0.05 | 5.35E+09 | 7.6E+08  | 7.8E+08  | 4.76E+07 | 0.20 | 0.02 | 143333 | 26864 |
| TG(14:0/14:0/14:0)                                                         | 18.98 | 0.00 | 0.00 | 1.19E+10 | 1.25E+09 | 2.13E+09 | 1.86E+08 | 0.21 | 0.01 | 122958 | 6704  |
| TG(16:0/16:0/16:0)                                                         | 20.29 | 0.01 | 0.05 | 2.36E+09 | 2.88E+08 | 5.17E+08 | 6.54E+07 | 0.11 | 0.00 | 544376 | 0     |
| TG(22:1(13Z)/22:1(13Z)/22:1(13Z))                                          | 21.84 | 0.01 | 0.05 | 1.9E+10  | 1.44E+09 | 3.12E+09 | 1.51E+08 | 0.29 | 0.03 | 84746  | 90    |

Cer: ceramide, CL: cardiolipin, DG: diacylglycerol, FA: fatty acid, LysoPC: lysophosphatidylcholine, LysoPE: lysophosphatidylethanolamine, LysoPG: lysophosphatidylglycerol, LysoPI: lysophosphatidylinositol, PA: phosphatidic acid, PC: phosphatidylcholine, PE: phosphatidylethanolamine, PG: phosphatidylglycerol, PI: phosphatidylinositol, PL: plasmalogen, PS: phosphatidylserine, SM: sphingomyelin, TG: triacylglycerol



Table S4: Retention time (RT), peak area, peak height, peak width and theoretical plate numbers, with their standard deviations (SD), of standard lipids detected by LC-MS in negative and positive ion modes using the Kinetex C18 column

| Compound                                                                    | RT (min) |      |      | Area     |          | Height   |          | Width |      | Number of plates |        |
|-----------------------------------------------------------------------------|----------|------|------|----------|----------|----------|----------|-------|------|------------------|--------|
|                                                                             | Mean     | SD   | %SD  | Mean     | SD       | Mean     | SD       | Mean  | SD   | MEAN             | SD     |
| <u>Negative ionization mode</u>                                             |          |      |      |          |          |          |          |       |      |                  |        |
| LysoPG(14:0/0:0) + LysoPI(20:4(5Z,8Z,11Z,14Z)/0:0) + LysoPC(14:0/0:0)       | 0.91     | 0.03 | 3.30 | 9.74E+09 | 1.11E+08 | 8.99E+08 | 2.11E+07 | 0.42  | 0.00 | 75               | 5      |
| LysoPI(16:0/0:0) + LysoPG(18:1(9Z)/0:0)                                     | 1.34     | 0.00 | 0.00 | 6.83E+09 | 2.01E+08 | 8.12E+08 | 3.37E+07 | 0.30  | 0.00 | 319              | 0      |
| FA(12:0) + LysoPE(18:1(9Z)/0:0)                                             | 1.71     | 0.00 | 0.00 | 5.06E+09 | 1.13E+08 | 5.06E+08 | 2.82E+07 | 0.56  | 0.00 | 149              | 0      |
| FA(18:1(9Z))                                                                | 4.13     | 0.02 | 0.40 | 4.52E+08 | 7.31E+06 | 7.81E+07 | 1.08E+06 | 0.23  | 0.02 | 5082             | 831    |
| PC(12:0/12:0)                                                               | 4.42     | 0.00 | 0.00 | 2.68E+09 | 5.23E+07 | 3.82E+08 | 8.54E+06 | 0.38  | 0.01 | 2217             | 147    |
| PE(12:0/12:0)                                                               | 4.86     | 0.01 | 0.23 | 3.09E+09 | 1.17E+08 | 3.77E+08 | 1.35E+07 | 0.31  | 0.01 | 3847             | 351    |
| LysoPC(22:0/0:0)                                                            | 5.19     | 0.00 | 0.00 | 3.69E+09 | 2.03E+08 | 4.06E+08 | 1.80E+07 | 0.68  | 0.04 | 928              | 108    |
| SM(d18:1/12:0)                                                              | 5.86     | 0.01 | 0.15 | 4.56E+09 | 1.06E+08 | 5.58E+08 | 2.30E+07 | 0.43  | 0.00 | 2967             | 9      |
| PS(14:0/14:0)                                                               | 6.18     | 0.00 | 0.00 | 1.25E+09 | 7.62E+07 | 1.44E+08 | 9.33E+06 | 0.27  | 0.04 | 9197             | 3430   |
| PG(14:0/14:0)                                                               | 6.42     | 0.01 | 0.14 | 7.98E+09 | 4.14E+08 | 8.12E+08 | 2.01E+07 | 0.47  | 0.06 | 3075             | 628    |
| PE(22:6(4Z,7Z,10Z,13Z,16Z,19Z)/22:6(4Z,7Z,10Z,13Z,16Z,19Z))                 | 7.42     | 0.00 | 0.00 | 3.58E+09 | 1.19E+08 | 8.39E+08 | 4.08E+07 | 0.21  | 0.01 | 20860            | 1980   |
| Cer(d18:1/12:0)                                                             | 7.66     | 0.00 | 0.00 | 2.88E+09 | 4.35E+07 | 4.97E+08 | 1.42E+07 | 0.33  | 0.04 | 9013             | 1868   |
| PI(16:0/18:1(9Z))                                                           | 8.59     | 0.00 | 0.00 | 1.51E+08 | 1.24E+07 | 3.17E+07 | 2.77E+06 | 0.27  | 0.02 | 16015            | 2912   |
| PG(18:1(9Z)/18:1(9Z)) + PS(18:1(9Z)/18:1(9Z))                               | 8.97     | 0.01 | 0.10 | 6.31E+09 | 4.28E+07 | 6.3E+08  | 6.48E+06 | 0.62  | 0.05 | 3348             | 441    |
| PA(18:1(9Z)/18:1(9Z))                                                       | 9.65     | 0.01 | 0.11 | 1.69E+09 | 8.14E+07 | 1.54E+08 | 1.33E+07 | 0.45  | 0.05 | 7457             | 1737   |
| PC(18:1(9Z)/18:1(9Z))                                                       | 10.04    | 0.00 | 0.00 | 2.53E+09 | 1.23E+07 | 3.14E+08 | 6.31E+06 | 0.43  | 0.02 | 8843             | 766    |
| PC(P-18:0/20:4(5Z,8Z,11Z,14Z) + Cer(d18:1/18:1(9Z)) + PE(18:1(9Z)/18:1(9Z)) | 10.55    | 0.00 | 0.00 | 8.49E+09 | 7.74E+07 | 1.06E+09 | 3.51E+07 | 0.69  | 0.09 | 3948             | 1351   |
| FA(26:0/26:0)                                                               | 11.63    | 0.01 | 0.09 | 1.8E+08  | 2.11E+07 | 2.59E+07 | 3.24E+06 | 0.16  | 0.00 | 84507            | 159    |
| PC(P-18:0/18:1(9Z))                                                         | 11.81    | 0.00 | 0.00 | 1.85E+09 | 8.61E+07 | 2.3E+08  | 1.74E+07 | 0.42  | 0.08 | 14175            | 7125   |
| PE(P-18:0/18:1(9Z))+ SM(d18:1/24:1(15Z))                                    | 12.42    | 0.00 | 0.00 | 4.84E+09 | 2.97E+08 | 6.49E+08 | 3.23E+07 | 0.59  | 0.06 | 7313             | 1321   |
| PC(22:1(13Z)/22:1(13Z))                                                     | 14.64    | 0.00 | 0.00 | 1.95E+09 | 6.01E+07 | 3.13E+08 | 1.49E+07 | 0.36  | 0.02 | 26635            | 2816   |
| CL(18:2) <sub>4</sub>                                                       | 16.60    | 0.00 | 0.00 | 8.93E+08 | 5.09E+07 | 1.81E+08 | 2.07E+07 | 0.37  | 0.01 | 32963            | 1693   |
| CL(18:2) <sub>3</sub> (18:1)                                                | 16.86    | 0.00 | 0.00 | 1.08E+08 | 5.64E+06 | 2.40E+07 | 1.92E+06 | 0.11  | 0.02 | 430827           | 158571 |
| CL(18:2) <sub>2</sub> (18:1) <sub>2</sub>                                   | 17.00    | 0.00 | 0.00 | 3.12E+08 | 1.71E+07 | 44294696 | 3.56E+06 | 0.33  | 0.03 | 41990            | 5693   |
| <u>Positive ionization mode</u>                                             |          |      |      |          |          |          |          |       |      |                  |        |
| LysoPG(14:0/0:0) + LysoPI(20:4(5Z,8Z,11Z,14Z)/0:0)                          | 0.94     | 0.00 | 0.00 | 1.74E+10 | 9.32E+08 | 2.42E+09 | 8.74E+07 | 0.18  | 0.03 | 468              | 134    |
| LysoPC(14:0/0:0)                                                            | 1.00     | 0.02 | 1.64 | 2.19E+10 | 4.53E+08 | 2.68E+09 | 4.26E+07 | 0.25  | 0.00 | 257              | 8      |

Supplemental Tables for “Comprehensive untargeted lipidomic analysis using core-shell C30 particle column and high field orbitrap mass spectrometer”, by Mónica Narváez-Rivas and Qibin Zhang, *Journal of Chromatography A*.

|                                                                            |       |      |      |          |          |          |          |      |      |        |       |
|----------------------------------------------------------------------------|-------|------|------|----------|----------|----------|----------|------|------|--------|-------|
| LysoPI(16:0/0:0) + LPG(18:1(9Z) /0:0)                                      | 1.34  | 0.00 | 0.00 | 2.00E+10 | 5.72E+08 | 2.18E+09 | 5.10E+07 | 0.29 | 0.00 | 342    | 0     |
| LysoPE(18:1(9Z)/0:0)                                                       | 1.71  | 0.01 | 0.52 | 1.51E+10 | 5.92E+08 | 1.23E+09 | 4.99E+07 | 0.58 | 0.01 | 137    | 7     |
| PC(12:0/12:0)                                                              | 4.39  | 0.00 | 0.00 | 2.62E+10 | 5.26E+08 | 2.78E+09 | 6.01E+07 | 0.40 | 0.03 | 1953   | 293   |
| PE(12:0/12:0)                                                              | 4.84  | 0.01 | 0.28 | 2.09E+10 | 4.64E+08 | 2.26E+09 | 5.83E+07 | 0.30 | 0.02 | 4144   | 429   |
| LysoPC(22:0/0:0) + DG(12:1(11Z)/12:1(11Z)/0:0)                             | 5.17  | 0.00 | 0.00 | 2.88E+10 | 8.31E+08 | 2.42E+09 | 2.23E+07 | 0.59 | 0.02 | 1223   | 72    |
| SM(d18:1/12:0)                                                             | 5.85  | 0.01 | 0.19 | 2.57E+10 | 4.16E+08 | 2.44E+09 | 3.33E+07 | 0.47 | 0.05 | 2518   | 549   |
| PS(14:0/14:0)                                                              | 6.30  | 0.01 | 0.21 | 5.41E+09 | 1.7E+08  | 9.65E+08 | 4.74E+07 | 0.13 | 0.00 | 37529  | 160   |
| PG(14:0/14:0)                                                              | 6.52  | 0.01 | 0.17 | 2.28E+10 | 3.28E+08 | 1.72E+09 | 2.51E+07 | 0.41 | 0.08 | 4557   | 1975  |
| PE(22:6(4Z,7Z,10Z,13Z,16Z,19Z)/22:6(4Z,7Z,10Z,13Z,16Z,19Z))                | 7.46  | 0.02 | 0.22 | 1.20E+10 | 2.70E+07 | 1.85E+09 | 7.33E+07 | 0.21 | 0.00 | 20180  | 89    |
| Cer(d18:1/12:0)                                                            | 7.64  | 0.02 | 0.22 | 3.00E+10 | 4.73E+08 | 3.53E+09 | 5.28E+07 | 0.34 | 0.04 | 8500   | 1793  |
| PI(16:0/18:1(9Z))                                                          | 8.59  | 0.00 | 0.00 | 1.65E+09 | 1.33E+08 | 3.88E+08 | 1.81E+07 | 0.22 | 0.03 | 24656  | 4730  |
| PG(18:1(9Z)/18:1(9Z)) + PS(18:1(9Z)/18:1(9Z))                              | 9.08  | 0.01 | 0.10 | 3.15E+10 | 6.13E+08 | 1.76E+09 | 3.77E+07 | 0.59 | 0.05 | 3806   | 622   |
| DG(14:0/14:0/0:0) + PA(18:1(9Z)/18:1(9Z))                                  | 9.74  | 0.00 | 0.00 | 2.81E+10 | 1.12E+09 | 1.99E+09 | 5.43E+07 | 0.51 | 0.03 | 5938   | 720   |
| PC(18:1(9Z)/18:1(9Z))                                                      | 10.02 | 0.01 | 0.13 | 4.40E+10 | 1.5E+09  | 3.18E+09 | 8.30E+07 | 0.45 | 0.02 | 7886   | 609   |
| PC(P-18:0/20:4(5Z,8Z,11Z,14Z)+ Cer(d18:1/18:1(9Z)) + PE(18:1(9Z)/18:1(9Z)) | 10.57 | 0.00 | 0.00 | 7.89E+10 | 2.81E+09 | 5.34E+09 | 2.03E+08 | 0.75 | 0.01 | 3145   | 73    |
| DG(18:1(9Z)/18:1(9Z)/0:0)                                                  | 11.16 | 0.01 | 0.08 | 4.49E+09 | 3.18E+08 | 9.49E+08 | 6.98E+07 | 0.16 | 0.00 | 77785  | 125   |
| TG(12:1(11Z)/12:1(11Z)/12:1(11Z))                                          | 11.39 | 0.01 | 0.10 | 3.25E+10 | 1.72E+09 | 2.47E+09 | 9.16E+07 | 0.37 | 0.01 | 14895  | 1163  |
| PC(P-18:0/18:1(9Z))                                                        | 11.80 | 0.02 | 0.14 | 3.57E+10 | 9.31E+08 | 2.40E+09 | 1.01E+08 | 0.58 | 0.03 | 6701   | 608   |
| PE(P-18:0/18:1(9Z))+ SM(d18:1/24:1(15Z))                                   | 12.40 | 0.01 | 0.04 | 2.79E+10 | 1.34E+09 | 2.36E+09 | 1.01E+08 | 0.67 | 0.03 | 5503   | 491   |
| PC(22:1(13Z)/22:1(13Z))                                                    | 14.62 | 0.00 | 0.00 | 2.08E+10 | 2.68E+08 | 1.47E+09 | 2.40E+07 | 0.38 | 0.02 | 23538  | 1975  |
| CL(18:2) <sub>4</sub>                                                      | 16.64 | 0.02 | 0.10 | 7.89E+09 | 3.88E+08 | 8.79E+08 | 2.02E+07 | 0.40 | 0.05 | 29331  | 8538  |
| DG(22:1(13Z)/22:1(13Z)/0:0)                                                | 16.91 | 0.01 | 0.08 | 3.52E+09 | 3.16E+08 | 4.12E+08 | 4.92E+07 | 0.29 | 0.03 | 55352  | 13769 |
| TG(14:0/14:0/14:0)                                                         | 17.24 | 0.00 | 0.00 | 1.42E+10 | 8.12E+08 | 2.40E+09 | 5.77E+07 | 0.25 | 0.06 | 83277  | 33627 |
| TG(16:0/16:0/16:0)                                                         | 18.69 | 0.11 | 0.57 | 4.70E+09 | 1.03E+09 | 1.28E+09 | 2.83E+08 | 0.21 | 0.03 | 135470 | 36487 |
| TG(22:1(13Z)/22:1(13Z)/22:1(13Z))                                          | 20.48 | 0.00 | 0.00 | 1.84E+10 | 2.58E+08 | 3.36E+09 | 4.19E+07 | 0.26 | 0.01 | 96947  | 10935 |

Cer: ceramide, CL: cardiolipin, DG: diacylglycerol, FA: fatty acid, LysoPC: lysophosphatidylcholine, LysoPE: lysophosphatidylethanolamine, LysoPG: lysophosphatidylglycerol, LysoPI: lysophosphatidylinositol, PA: phosphatidic acid, PC: phosphatidylcholine, PE: phosphatidylethanolamine, PG: phosphatidylglycerol, PI: phosphatidylinositol, PL: plasmalogen, PS: phosphatidylserine, SM: sphingomyelin, TG: triacylglycerol

Table S5: Lipids identified in rat liver by LC-MS/MS using the Accucore C30 column

| Lipid Molecule          | Class | Fatty acids (FA)    | FA Group | Calc Mass | Formula         | Base Rt | Main Ion |
|-------------------------|-------|---------------------|----------|-----------|-----------------|---------|----------|
| Cer(d15:0/26:1)         | Cer   | d15:0/26:1          | d41:1    | 635.6216  | C41 H81 O3 N1   | 17.255  | -H       |
| Cer(d18:0/16:0)         | Cer   | d18:0/16:0          | d34:0    | 539.5277  | C34 H69 O3 N1   | 12.779  | +H       |
| Cer(d18:0/18:0)         | Cer   | d18:0/18:0          | d36:0    | 567.559   | C36 H73 O3 N1   | 14.396  | +H       |
| Cer(d18:0/24:0)         | Cer   | d18:0/24:0          | d42:0    | 651.6529  | C42 H85 O3 N1   | 17.854  | +H       |
| Cer(d18:0/24:2)         | Cer   | d18:0/24:2          | d42:2    | 647.6216  | C42 H81 O3 N1   | 16.009  | +H       |
| Cer(d18:1/16:0)         | Cer   | d18:1/16:0          | d34:1    | 537.5121  | C34 H67 O3 N1   | 12.193  | +H       |
| Cer(d18:1/18:0)         | Cer   | d18:1/18:0          | d36:1    | 565.5434  | C36 H71 O3 N1   | 13.838  | +H       |
| Cer(d18:1/20:0)         | Cer   | d18:1/20:0          | d38:1    | 593.5747  | C38 H75 O3 N1   | 15.42   | +H       |
| Cer(d18:1/22:0)         | Cer   | d18:1/22:0          | d40:1    | 621.606   | C40 H79 O3 N1   | 16.729  | +H       |
| Cer(d18:1/22:1)         | Cer   | d18:1/22:1          | d40:2    | 619.5903  | C40 H77 O3 N1   | 15.314  | +H       |
| Cer(d18:1/24:0)         | Cer   | d18:1/24:0          | d42:1    | 649.6373  | C42 H83 O3 N1   | 15.493  | +H       |
| Cer(d18:1/24:0)         | Cer   | d18:1/24:0          | d42:1    | 649.6373  | C42 H83 O3 N1   | 17.548  | +H       |
| Cer(d18:1/24:1)         | Cer   | d18:1/24:1          | d42:2    | 647.6216  | C42 H81 O3 N1   | 16.571  | +H       |
| Cer(d18:1/24:2)         | Cer   | d18:1/24:2          | d42:3    | 645.606   | C42 H79 O3 N1   | 15.534  | +H       |
| Cer(d18:1/26:0)         | Cer   | d18:1/26:0          | d44:1    | 677.6686  | C44 H87 O3 N1   | 18.524  | +H       |
| Cer(d18:1/26:1)         | Cer   | d18:1/26:1          | d44:2    | 675.6529  | C44 H85 O3 N1   | 17.591  | +H       |
| CL(17:2,18:2,18:2,18:2) | CL    | 17:2/18:2/18:2/18:2 | 71:08    | 1434.957  | C80 H140 O17 P2 | 18.272  | -H       |
| CL(18:1,16:0,16:0,18:1) | CL    | 18:1/16:0/16:0/18:1 | 68:02    | 1405.004  | C77 H146 O17 P2 | 19.74   | -H       |
| CL(18:2,12:0,18:2,18:2) | CL    | 18:2/12:0/18:2/18:2 | 66:06    | 1368.91   | C75 H134 O17 P2 | 17.842  | -H       |
| CL(18:2,14:0,20:4,18:2) | CL    | 18:2/14:0/20:4/18:2 | 70:08    | 1420.941  | C79 H138 O17 P2 | 18.714  | -H       |
| CL(18:2,15:0,18:2,18:1) | CL    | 18:2/15:0/18:2/18:1 | 69:05    | 1412.972  | C78 H142 O17 P2 | 18.931  | -H       |
| CL(18:2,16:0,16:0,22:4) | CL    | 18:2/16:0/16:0/22:4 | 72:06    | 1453.004  | C81 H146 O17 P2 | 11.502  | -H       |
| CL(18:2,16:0,18:1,16:0) | CL    | 18:2/16:0/18:1/16:0 | 68:03    | 1402.988  | C77 H144 O17 P2 | 19.468  | -H       |
| CL(18:2,16:1,16:1,18:2) | CL    | 18:2/16:1/16:1/18:2 | 68:06    | 1396.941  | C77 H138 O17 P2 | 18.341  | -H       |
| CL(18:2,16:1,18:1,18:2) | CL    | 18:2/16:1/18:1/18:2 | 70:06    | 1424.972  | C79 H142 O17 P2 | 18.765  | -H       |
| CL(18:2,18:0,18:0,20:1) | CL    | 18:2/18:0/18:0/20:1 | 74:03    | 1487.082  | C83 H156 O17 P2 | 13.115  | -H       |
| CL(18:2,18:0,18:0,22:4) | CL    | 18:2/18:0/18:0/22:4 | 76:06    | 1509.066  | C85 H154 O17 P2 | 13.12   | -H       |

|                         |    |                     |       |          |                 |        |      |
|-------------------------|----|---------------------|-------|----------|-----------------|--------|------|
| CL(18:2,18:1,16:0,18:1) | CL | 18:2/18:1/16:0/18:1 | 70:04 | 1429.004 | C79 H146 O17 P2 | 19.464 | -H   |
| CL(18:2,18:1,18:1,18:2) | CL | 18:2/18:1/18:1/18:2 | 72:06 | 1453.004 | C81 H146 O17 P2 | 19.145 | -H   |
| CL(18:2,18:2,16:0,18:1) | CL | 18:2/18:2/16:0/18:1 | 70:05 | 1426.988 | C79 H144 O17 P2 | 19.136 | -H   |
| CL(18:2,18:2,18:2,18:2) | CL | 18:2/18:2/18:2/18:2 | 72:08 | 1448.972 | C81 H142 O17 P2 | 18.485 | -H   |
| CL(18:2,18:2,18:2,18:2) | CL | 18:2/18:2/18:2/18:2 | 72:08 | 1448.972 | C81 H142 O17 P2 | 19.167 | -H   |
| CL(18:2,18:2,20:3,18:2) | CL | 18:2/18:2/20:3/18:2 | 74:09 | 1474.988 | C83 H144 O17 P2 | 18.594 | -H   |
| CL(18:2,18:2,22:5,18:2) | CL | 18:2/18:2/22:5/18:2 | 76:11 | 1498.988 | C85 H144 O17 P2 | 18.914 | -H   |
| CL(18:2,18:2,22:6,18:2) | CL | 18:2/18:2/22:6/18:2 | 76:12 | 1496.972 | C85 H142 O17 P2 | 18.267 | -H   |
| CL(18:2,20:4,18:1,18:2) | CL | 18:2/20:4/18:1/18:2 | 74:09 | 1474.988 | C83 H144 O17 P2 | 19.148 | -H   |
| CL(18:3,16:1,18:2,18:2) | CL | 18:3/16:1/18:2/18:2 | 70:08 | 1420.941 | C79 H138 O17 P2 | 18.062 | -H   |
| CL(18:3,18:2,16:1,22:6) | CL | 18:3/18:2/16:1/22:6 | 74:12 | 1468.941 | C83 H138 O17 P2 | 18.151 | -H   |
| CL(18:3,18:2,18:2,18:2) | CL | 18:3/18:2/18:2/18:2 | 72:09 | 1446.957 | C81 H140 O17 P2 | 18.149 | -H   |
| CL(19:2,18:2,18:2,18:2) | CL | 19:2/18:2/18:2/18:2 | 73:08 | 1462.988 | C82 H144 O17 P2 | 18.7   | -H   |
| CL(20:2,18:2,18:1,18:2) | CL | 20:2/18:2/18:1/18:2 | 74:07 | 1479.019 | C83 H148 O17 P2 | 19.208 | -H   |
| CL(20:5,18:2,14:0,18:2) | CL | 20:5/18:2/14:0/18:2 | 70:09 | 1418.925 | C79 H136 O17 P2 | 18.334 | -H   |
| CL(20:5,18:2,16:1,18:2) | CL | 20:5/18:2/16:1/18:2 | 72:10 | 1444.941 | C81 H138 O17 P2 | 18.385 | -H   |
| CL(20:5,18:2,18:2,18:2) | CL | 20:5/18:2/18:2/18:2 | 74:11 | 1470.957 | C83 H140 O17 P2 | 18.092 | -H   |
| CL(20:5,18:2,18:2,18:2) | CL | 20:5/18:2/18:2/18:2 | 74:11 | 1470.957 | C83 H140 O17 P2 | 18.488 | -H   |
| CL(20:5,18:2,18:2,20:4) | CL | 20:5/18:2/18:2/20:4 | 76:13 | 1494.957 | C85 H140 O17 P2 | 18.387 | -H   |
| CL(20:5,18:2,22:6,18:2) | CL | 20:5/18:2/22:6/18:2 | 78:15 | 1518.957 | C87 H140 O17 P2 | 18.268 | -H   |
| CL(21:0,16:0,20:3,22:6) | CL | 21:0/16:0/20:3/22:6 | 79:09 | 1545.066 | C88 H154 O17 P2 | 10.894 | -H   |
| CL(22:2,18:0,20:4,20:4) | CL | 22:2/18:0/20:4/20:4 | 80:10 | 1557.066 | C89 H154 O17 P2 | 12.904 | -H   |
| CL(22:3,16:0,16:0,20:4) | CL | 22:3/16:0/16:0/20:4 | 74:07 | 1479.019 | C83 H148 O17 P2 | 11.287 | -H   |
| CL(22:3,16:0,18:1,22:5) | CL | 22:3/16:0/18:1/22:5 | 78:09 | 1531.051 | C87 H152 O17 P2 | 11.37  | -H   |
| CL(22:3,18:0,18:0,20:4) | CL | 22:3/18:0/18:0/20:4 | 78:07 | 1535.082 | C87 H156 O17 P2 | 12.899 | -H   |
| CL(23:0,16:0,20:4,22:6) | CL | 23:0/16:0/20:4/22:6 | 81:10 | 1571.082 | C90 H156 O17 P2 | 10.933 | -H   |
| CL(23:0,18:0,20:3,22:6) | CL | 23:0/18:0/20:3/22:6 | 83:09 | 1601.129 | C92 H162 O17 P2 | 12.506 | -H   |
| DG(16:0,18:2)           | DG | 16:0/18:2           | 34:02 | 592.5067 | C37 H68 O5      | 13.856 | +NH4 |
| DG(16:0,20:4)           | DG | 16:0/20:4           | 36:04 | 616.5067 | C39 H68 O5      | 10.061 | +H   |
| DG(16:0,20:4)           | DG | 16:0/20:4           | 36:04 | 616.5067 | C39 H68 O5      | 13.541 | +NH4 |
| DG(16:0,22:6)           | DG | 16:0/22:6           | 38:06 | 640.5067 | C41 H68 O5      | 13.122 | +NH4 |
| DG(18:0,20:3)           | DG | 18:0/20:3           | 38:03 | 646.5536 | C41 H74 O5      | 12.198 | +H   |

|                   |     |           |       |          |                  |        |      |
|-------------------|-----|-----------|-------|----------|------------------|--------|------|
| DG(18:0,20:4)     | DG  | 18:0/20:4 | 38:04 | 644.538  | C41 H72 O5       | 11.597 | +H   |
| DG(18:0,20:4)     | DG  | 18:0/20:4 | 38:04 | 644.538  | C41 H72 O5       | 15.113 | +NH4 |
| DG(18:0,22:6)     | DG  | 18:0/22:6 | 40:06 | 668.538  | C43 H72 O5       | 14.7   | +NH4 |
| DG(18:1,18:1)     | DG  | 18:1/18:1 | 36:02 | 620.538  | C39 H72 O5       | 15.107 | +NH4 |
| DG(18:1,18:2)     | DG  | 18:1/18:2 | 36:03 | 618.5223 | C39 H70 O5       | 13.921 | +NH4 |
| DG(18:1,18:3)     | DG  | 18:1/18:3 | 36:04 | 616.5067 | C39 H68 O5       | 18.474 | +H   |
| DG(18:1,22:6)     | DG  | 18:1/22:6 | 40:07 | 666.5223 | C43 H70 O5       | 13.133 | +NH4 |
| DG(18:2,18:2)     | DG  | 18:2/18:2 | 36:04 | 616.5067 | C39 H68 O5       | 12.706 | +NH4 |
| DG(18:2,20:4)     | DG  | 18:2/20:4 | 38:06 | 640.5067 | C41 H68 O5       | 12.324 | +NH4 |
| DG(18:2,22:6)     | DG  | 18:2/22:6 | 40:08 | 664.5067 | C43 H68 O5       | 11.898 | +NH4 |
| DG(18:3,18:2)     | DG  | 18:3/18:2 | 36:05 | 614.491  | C39 H66 O5       | 11.634 | +H   |
| DG(20:2,18:2)     | DG  | 20:2/18:2 | 38:04 | 644.538  | C41 H72 O5       | 14.129 | +NH4 |
| DG(20:3,18:2)     | DG  | 20:3/18:2 | 38:05 | 642.5223 | C41 H70 O5       | 13.055 | +NH4 |
| DG(20:5,18:2)     | DG  | 20:5/18:2 | 38:07 | 638.491  | C41 H66 O5       | 11.298 | +NH4 |
| DG(22:4,18:2)     | DG  | 22:4/18:2 | 40:06 | 668.538  | C43 H72 O5       | 13.471 | +NH4 |
| LysoPC(14:0/0:0)  | LPC | 14:00     | 14:00 | 467.3012 | C22 H46 O7 N1 P1 | 1.674  | +H   |
| LysoPC(15:0/0:0)  | LPC | 15:00     | 15:00 | 481.3168 | C23 H48 O7 N1 P1 | 2.009  | +H   |
| LysoPC(0:0/16:0)  | LPC | 16:00     | 16:00 | 495.3325 | C24 H50 O7 N1 P1 | 1.959  | +H   |
| LysoPC(16:0/0:0)  | LPC | 16:00     | 16:00 | 495.3325 | C24 H50 O7 N1 P1 | 2.478  | +H   |
| LysoPC(0:0/16:0e) | LPC | 16:0e     | 16:0e | 481.3532 | C24 H52 O6 N1 P1 | 2.971  | +H   |
| LysoPC(0:0/16:0p) | LPC | 16:0p     | 16:0p | 479.3376 | C24 H50 O6 N1 P1 | 10.5   | +H   |
| LysoPC(0:0/16:1)  | LPC | 16:01     | 16:01 | 493.3168 | C24 H48 O7 N1 P1 | 1.675  | +H   |
| LysoPC(16:1p/0:0) | LPC | 16:1p     | 16:1p | 477.3219 | C24 H48 O6 N1 P1 | 2.477  | +H   |
| LysoPC(17:0/0:0)  | LPC | 17:00     | 17:00 | 509.3481 | C25 H52 O7 N1 P1 | 2.882  | +H   |
| LysoPC(0:0/18:0)  | LPC | 18:00     | 18:00 | 523.3638 | C26 H54 O7 N1 P1 | 3.495  | +H   |
| LysoPC(18:0/0:0)  | LPC | 18:00     | 18:00 | 523.3638 | C26 H54 O7 N1 P1 | 3.826  | +H   |
| LysoPC(0:0/18:0e) | LPC | 18:0e     | 18:0e | 509.3845 | C26 H56 O6 N1 P1 | 4.608  | +H   |
| LysoPC(0:0/18:0p) | LPC | 18:0p     | 18:0p | 507.3689 | C26 H54 O6 N1 P1 | 3.153  | +H   |
| LysoPC(0:0/18:1)  | LPC | 18:01     | 18:01 | 521.3481 | C26 H52 O7 N1 P1 | 2.45   | +H   |
| LysoPC(18:1/0:0)  | LPC | 18:01     | 18:01 | 521.3481 | C26 H52 O7 N1 P1 | 2.635  | +H   |
| LysoPC(18:1p/0:0) | LPC | 18:1p     | 18:1p | 505.3532 | C26 H52 O6 N1 P1 | 3.824  | +H   |
| LysoPC(0:0/18:2)  | LPC | 18:02     | 18:02 | 519.3325 | C26 H50 O7 N1 P1 | 1.861  | +H   |

Supplemental Tables for “Comprehensive untargeted lipidomic analysis using core-shell C30 particle column and high field orbitrap mass spectrometer”, by Mónica Narváez-Rivas and Qibin Zhang, *Journal of Chromatography A*.

|                   |     |           |       |          |                   |        |       |
|-------------------|-----|-----------|-------|----------|-------------------|--------|-------|
| LysoPC(18:2/0:0)  | LPC | 18:02     | 18:02 | 519.3325 | C26 H50 O7 N1 P1  | 1.991  | +H    |
| LysoPC(18:3/0:0)  | LPC | 18:03     | 18:03 | 517.3168 | C26 H48 O7 N1 P1  | 1.589  | +H    |
| LysoPC(0:0/19:0)  | LPC | 19:00     | 19:00 | 537.3794 | C27 H56 O7 N1 P1  | 4.354  | +H    |
| LysoPC(19:0/0:0)  | LPC | 19:00     | 19:00 | 537.3794 | C27 H56 O7 N1 P1  | 4.736  | +H    |
| LysoPC(19:1/0:0)  | LPC | 19:01     | 19:01 | 535.3638 | C27 H54 O7 N1 P1  | 3.217  | +H    |
| LysoPC(20:0/0:0)  | LPC | 20:00     | 20:00 | 551.3951 | C28 H58 O7 N1 P1  | 5.454  | +H    |
| LysoPC(0:0/20:0e) | LPC | 20:0e     | 20:0e | 537.4158 | C28 H60 O6 N1 P1  | 6.668  | +H    |
| LysoPC(20:1/0:0)  | LPC | 20:01     | 20:01 | 549.3794 | C28 H56 O7 N1 P1  | 3.947  | +HCOO |
| LysoPC(0:0/20:2)  | LPC | 20:02     | 20:02 | 547.3638 | C28 H54 O7 N1 P1  | 2.667  | +H    |
| LysoPC(0:0/20:3)  | LPC | 20:03     | 20:03 | 545.3481 | C28 H52 O7 N1 P1  | 2.106  | +H    |
| LysoPC(0:0/20:4)  | LPC | 20:04     | 20:04 | 543.3325 | C28 H50 O7 N1 P1  | 1.818  | +H    |
| LysoPC(0:0/20:5)  | LPC | 20:05     | 20:05 | 541.3168 | C28 H48 O7 N1 P1  | 1.49   | +H    |
| LysoPC(22:0/0:0)  | LPC | 22:00     | 22:00 | 579.4264 | C30 H62 O7 N1 P1  | 7.511  | +H    |
| LysoPC(0:0/22:4)  | LPC | 22:04     | 22:04 | 571.3638 | C30 H54 O7 N1 P1  | 2.426  | +H    |
| LysoPC(0:0/22:5)  | LPC | 22:05     | 22:05 | 569.3481 | C30 H52 O7 N1 P1  | 1.913  | +H    |
| LysoPC(0:0/22:6)  | LPC | 22:06     | 22:06 | 567.3325 | C30 H50 O7 N1 P1  | 1.722  | +H    |
| LysoPC(24:0/0:0)  | LPC | 24:00     | 24:00 | 607.4577 | C32 H66 O7 N1 P1  | 9.213  | +H    |
| LysoPC(24:1/0:0)  | LPC | 24:01     | 24:01 | 605.442  | C32 H64 O7 N1 P1  | 7.444  | +H    |
| LysoPE(18:2)      | LPE | 18:02     | 18:02 | 477.2855 | C23 H44 O7 N1 P1  | 1.954  | +H    |
| LysoPE(20:4)      | LPE | 20:04     | 20:04 | 501.2855 | C25 H44 O7 N1 P1  | 1.902  | -H    |
| LysoPE(22:5)      | LPE | 22:05     | 22:05 | 527.3012 | C27 H46 O7 N1 P1  | 2.006  | +H    |
| LysoPE(22:6)      | LPE | 22:06     | 22:06 | 525.2855 | C27 H44 O7 N1 P1  | 1.809  | +H    |
| LysoPG(18:2)      | LPG | 18:02     | 18:02 | 508.2801 | C24 H45 O9 N0 P1  | 1.773  | -H    |
| LysoPI(18:0)      | LPI | 18:00     | 18:00 | 600.3275 | C27 H53 O12 N0 P1 | 3.247  | +H    |
| LysoPI(20:4)      | LPI | 20:04     | 20:04 | 620.2962 | C29 H49 O12 N0 P1 | 1.607  | -H    |
| LysoPS(18:0)      | LPS | 18:00     | 18:00 | 525.3067 | C24 H48 O9 N1 P1  | 3.3    | +H    |
| LysoPS(20:4)      | LPS | 20:04     | 20:04 | 545.2754 | C26 H44 O9 N1 P1  | 1.626  | +H    |
| LysoPS(22:6)      | LPS | 22:06     | 22:06 | 569.2754 | C28 H44 O9 N1 P1  | 1.552  | +H    |
| PA(16:0,18:1)     | PA  | 16:0/18:1 | 34:01 | 674.4887 | C37 H71 O8 N0 P1  | 12.373 | -H    |
| PA(16:0,18:2)     | PA  | 16:0/18:2 | 34:02 | 672.473  | C37 H69 O8 N0 P1  | 11.187 | -H    |
| PA(16:0,20:4)     | PA  | 16:0/20:4 | 36:04 | 696.473  | C39 H69 O8 N0 P1  | 10.972 | -H    |
| PA(18:0,20:4)     | PA  | 18:0/20:4 | 38:04 | 724.5043 | C41 H73 O8 N0 P1  | 11.789 | -H    |

Supplemental Tables for “Comprehensive untargeted lipidomic analysis using core-shell C30 particle column and high field orbitrap mass spectrometer”, by Mónica Narváez-Rivas and Qibin Zhang, *Journal of Chromatography A*.

|                |    |            |       |          |                  |        |       |
|----------------|----|------------|-------|----------|------------------|--------|-------|
| PA(18:2,18:2)  | PA | 18:2/18:2  | 36:04 | 696.473  | C39 H69 O8 N0 P1 | 10.117 | -H    |
| PC(15:0/18:2)  | PC | 15:0/18:2  | 33:02 | 743.5465 | C41 H78 O8 N1 P1 | 10.293 | +HCOO |
| PC(15:0/20:4)  | PC | 15:0/20:4  | 35:04 | 767.5465 | C43 H78 O8 N1 P1 | 10.09  | +HCOO |
| PC(15:0/22:6)  | PC | 15:0/22:6  | 37:06 | 791.5465 | C45 H78 O8 N1 P1 | 9.732  | +HCOO |
| PC(16:0/16:0)  | PC | 16:0/16:0  | 32:00 | 733.5622 | C40 H80 O8 N1 P1 | 11.866 | +HCOO |
| PC(16:0/16:0)  | PC | 16:0/16:0  | 32:00 | 733.5622 | C40 H80 O8 N1 P1 | 12.122 | +HCOO |
| PC(16:0/16:1)  | PC | 16:0/16:1  | 32:01 | 731.5465 | C40 H78 O8 N1 P1 | 10.76  | +HCOO |
| PC(16:0/18:2)  | PC | 16:0/18:2  | 34:02 | 757.5622 | C42 H80 O8 N1 P1 | 11.083 | +HCOO |
| PC(16:0/20:3)  | PC | 16:0/20:3  | 36:03 | 783.5778 | C44 H82 O8 N1 P1 | 11.681 | +HCOO |
| PC(16:0/20:4)  | PC | 16:0/20:4  | 36:04 | 781.5622 | C44 H80 O8 N1 P1 | 10.022 | +H    |
| PC(16:0/22:4)  | PC | 16:0/22:4  | 38:04 | 809.5935 | C46 H84 O8 N1 P1 | 11.951 | +HCOO |
| PC(16:0/22:6)  | PC | 16:0/22:6  | 38:06 | 805.5622 | C46 H80 O8 N1 P1 | 10.507 | +HCOO |
| PC(16:0/24:7)  | PC | 16:0/24:7  | 40:07 | 831.5778 | C48 H82 O8 N1 P1 | 10.189 | +H    |
| PC(16:0e/16:0) | PC | 16:0e/16:0 | 32:0e | 719.5829 | C40 H82 O7 N1 P1 | 13.124 | +HCOO |
| PC(17:0/22:6)  | PC | 17:0/22:6  | 39:06 | 819.5778 | C47 H82 O8 N1 P1 | 11.305 | +HCOO |
| PC(17:4/18:0)  | PC | 17:4/18:0  | 35:04 | 767.5465 | C43 H78 O8 N1 P1 | 11.97  | +H    |
| PC(17:4/18:1)  | PC | 17:4/18:1  | 35:05 | 765.5309 | C43 H76 O8 N1 P1 | 11.356 | +H    |
| PC(17:4/18:1)  | PC | 17:4/18:1  | 35:05 | 765.5309 | C43 H76 O8 N1 P1 | 11.905 | +H    |
| PC(17:4/20:1)  | PC | 17:4/20:1  | 37:05 | 793.5622 | C45 H80 O8 N1 P1 | 12.831 | +H    |
| PC(18:0/18:0)  | PC | 18:0/18:0  | 36:00 | 789.6248 | C44 H88 O8 N1 P1 | 15.17  | +HCOO |
| PC(18:0/18:2)  | PC | 18:0/18:2  | 36:02 | 785.5935 | C44 H84 O8 N1 P1 | 12.683 | +HCOO |
| PC(18:0/20:4)  | PC | 18:0/20:4  | 38:04 | 809.5935 | C46 H84 O8 N1 P1 | 11.586 | +H    |
| PC(18:0/20:4)  | PC | 18:0/20:4  | 38:04 | 809.5935 | C46 H84 O8 N1 P1 | 11.941 | +H    |
| PC(18:0/20:4)  | PC | 18:0/20:4  | 38:04 | 809.5935 | C46 H84 O8 N1 P1 | 13.773 | +H    |
| PC(18:0/22:4)  | PC | 18:0/22:4  | 40:04 | 837.6248 | C48 H88 O8 N1 P1 | 13.503 | +HCOO |
| PC(18:0/22:5)  | PC | 18:0/22:5  | 40:05 | 835.6091 | C48 H86 O8 N1 P1 | 11.814 | +H    |
| PC(18:0/22:6)  | PC | 18:0/22:6  | 40:06 | 833.5935 | C48 H84 O8 N1 P1 | 12.088 | +HCOO |
| PC(18:0/23:6)  | PC | 18:0/23:6  | 41:06 | 847.6091 | C49 H86 O8 N1 P1 | 12.553 | +H    |
| PC(18:0e/16:0) | PC | 18:0e/16:0 | 34:0e | 747.6142 | C42 H86 O7 N1 P1 | 14.687 | +HCOO |
| PC(18:1/18:1)  | PC | 18:1/18:1  | 36:02 | 785.5935 | C44 H84 O8 N1 P1 | 12.407 | +HCOO |
| PC(18:1/19:5)  | PC | 18:1/19:5  | 37:06 | 791.5465 | C45 H78 O8 N1 P1 | 11.417 | +H    |
| PC(18:1/20:4)  | PC | 18:1/20:4  | 38:05 | 807.5778 | C46 H82 O8 N1 P1 | 10.505 | +H    |

Supplemental Tables for “Comprehensive untargeted lipidomic analysis using core-shell C30 particle column and high field orbitrap mass spectrometer”, by Mónica Narváez-Rivas and Qibin Zhang, *Journal of Chromatography A*.

|                |    |            |       |          |                  |        |       |
|----------------|----|------------|-------|----------|------------------|--------|-------|
| PC(18:1/22:5)  | PC | 18:1/22:5  | 40:06 | 833.5935 | C48 H84 O8 N1 P1 | 11.008 | +HCOO |
| PC(18:1/22:6)  | PC | 18:1/22:6  | 40:07 | 831.5778 | C48 H82 O8 N1 P1 | 9.897  | +H    |
| PC(18:2/18:2)  | PC | 18:2/18:2  | 36:04 | 781.5622 | C44 H80 O8 N1 P1 | 10.024 | +HCOO |
| PC(18:3/18:2)  | PC | 18:3/18:2  | 36:05 | 779.5465 | C44 H78 O8 N1 P1 | 9.048  | +HCOO |
| PC(19:0/18:2)  | PC | 19:0/18:2  | 37:02 | 799.6091 | C45 H86 O8 N1 P1 | 13.15  | +HCOO |
| PC(20:0/20:4)  | PC | 20:0/20:4  | 40:04 | 837.6248 | C48 H88 O8 N1 P1 | 14.043 | +HCOO |
| PC(20:2/18:2)  | PC | 20:2/18:2  | 38:04 | 809.5935 | C46 H84 O8 N1 P1 | 11.424 | +HCOO |
| PC(20:3/22:5)  | PC | 20:3/22:5  | 42:08 | 857.5935 | C50 H84 O8 N1 P1 | 10.629 | +H    |
| PE(14:0/18:2)  | PE | 14:0/18:2  | 32:02 | 687.4839 | C37 H70 O8 N1 P1 | 9.901  | +H    |
| PE(15:0/18:2)  | PE | 15:0/18:2  | 33:02 | 701.4996 | C38 H72 O8 N1 P1 | 10.681 | +H    |
| PE(15:0/22:6)  | PE | 15:0/22:6  | 37:06 | 749.4996 | C42 H72 O8 N1 P1 | 10.096 | +H    |
| PE(16:0/16:1)  | PE | 16:0/16:1  | 32:01 | 689.4996 | C37 H72 O8 N1 P1 | 11.169 | +H    |
| PE(16:0/18:1)  | PE | 16:0/18:1  | 34:01 | 717.5309 | C39 H76 O8 N1 P1 | 12.609 | +H    |
| PE(16:0/18:2)  | PE | 16:0/18:2  | 34:02 | 715.5152 | C39 H74 O8 N1 P1 | 11.496 | +H    |
| PE(16:0/20:1)  | PE | 16:0/20:1  | 36:01 | 745.5622 | C41 H80 O8 N1 P1 | 14.231 | +H    |
| PE(16:0/20:4)  | PE | 16:0/20:4  | 36:04 | 739.5152 | C41 H74 O8 N1 P1 | 11.274 | +H    |
| PE(16:0/22:4)  | PE | 16:0/22:4  | 38:04 | 767.5465 | C43 H78 O8 N1 P1 | 12.352 | +H    |
| PE(16:0/22:6)  | PE | 16:0/22:6  | 38:06 | 763.5152 | C43 H74 O8 N1 P1 | 10.642 | +H    |
| PE(16:0p/18:2) | PE | 16:0p/18:2 | 34:2p | 699.5203 | C39 H74 O7 N1 P1 | 12.271 | +H    |
| PE(16:0p/20:5) | PE | 16:0p/20:5 | 36:5p | 721.5046 | C41 H72 O7 N1 P1 | 11.03  | -H    |
| PE(16:0p/22:4) | PE | 16:0p/22:4 | 38:4p | 751.5516 | C43 H78 O7 N1 P1 | 13.112 | +H    |
| PE(16:0p/22:5) | PE | 16:0p/22:5 | 38:5p | 749.5359 | C43 H76 O7 N1 P1 | 12.101 | +H    |
| PE(16:1/18:2)  | PE | 16:1/18:2  | 34:03 | 713.4996 | C39 H72 O8 N1 P1 | 10.078 | +H    |
| PE(16:1/20:4)  | PE | 16:1/20:4  | 36:05 | 737.4996 | C41 H72 O8 N1 P1 | 9.863  | +H    |
| PE(17:0/18:2)  | PE | 17:0/18:2  | 35:02 | 729.5309 | C40 H76 O8 N1 P1 | 12.023 | +H    |
| PE(17:0/20:4)  | PE | 17:0/20:4  | 37:04 | 753.5309 | C42 H76 O8 N1 P1 | 11.809 | +H    |
| PE(17:0/20:4)  | PE | 17:0/20:4  | 37:04 | 753.5309 | C42 H76 O8 N1 P1 | 12.079 | +H    |
| PE(17:0/22:6)  | PE | 17:0/22:6  | 39:06 | 777.5309 | C44 H76 O8 N1 P1 | 11.709 | -H    |
| PE(17:1/20:4)  | PE | 17:1/20:4  | 37:05 | 751.5152 | C42 H74 O8 N1 P1 | 10.622 | +H    |
| PE(18:0/16:0)  | PE | 18:0/16:0  | 34:00 | 719.5465 | C39 H78 O8 N1 P1 | 14.112 | +H    |
| PE(18:0/18:2)  | PE | 18:0/18:2  | 36:02 | 743.5465 | C41 H78 O8 N1 P1 | 13.101 | +H    |
| PE(18:0/18:3)  | PE | 18:0/18:3  | 36:03 | 741.5309 | C41 H76 O8 N1 P1 | 12.087 | +H    |



Supplemental Tables for “Comprehensive untargeted lipidomic analysis using core-shell C30 particle column and high field orbitrap mass spectrometer”, by Mónica Narváez-Rivas and Qibin Zhang, *Journal of Chromatography A*.

|                |    |            |       |          |                  |        |    |
|----------------|----|------------|-------|----------|------------------|--------|----|
| PE(18:0/20:2)  | PE | 18:0/20:2  | 38:02 | 771.5778 | C43 H82 O8 N1 P1 | 14.405 | +H |
| PE(18:0/20:3)  | PE | 18:0/20:3  | 38:03 | 769.5622 | C43 H80 O8 N1 P1 | 13.48  | +H |
| PE(18:0/20:3)  | PE | 18:0/20:3  | 38:03 | 769.5622 | C43 H80 O8 N1 P1 | 13.956 | +H |
| PE(18:0/20:4)  | PE | 18:0/20:4  | 38:04 | 767.5465 | C43 H78 O8 N1 P1 | 12.889 | +H |
| PE(18:0/22:4)  | PE | 18:0/22:4  | 40:04 | 795.5778 | C45 H82 O8 N1 P1 | 13.912 | -H |
| PE(18:0/22:5)  | PE | 18:0/22:5  | 40:05 | 793.5622 | C45 H80 O8 N1 P1 | 12.952 | +H |
| PE(18:0/22:5)  | PE | 18:0/22:5  | 40:05 | 793.5622 | C45 H80 O8 N1 P1 | 13.456 | +H |
| PE(18:0/22:6)  | PE | 18:0/22:6  | 40:06 | 791.5465 | C45 H78 O8 N1 P1 | 12.51  | +H |
| PE(18:0p/20:3) | PE | 18:0p/20:3 | 38:3p | 753.5672 | C43 H80 O7 N1 P1 | 14.236 | +H |
| PE(18:0p/20:4) | PE | 18:0p/20:4 | 38:4p | 751.5516 | C43 H78 O7 N1 P1 | 13.617 | +H |
| PE(18:0p/22:5) | PE | 18:0p/22:5 | 40:5p | 777.5672 | C45 H80 O7 N1 P1 | 13.687 | +H |
| PE(18:0p/22:6) | PE | 18:0p/22:6 | 40:6p | 775.5516 | C45 H78 O7 N1 P1 | 13.217 | +H |
| PE(18:1/18:1)  | PE | 18:1/18:1  | 36:02 | 743.5465 | C41 H78 O8 N1 P1 | 12.817 | +H |
| PE(18:1/18:2)  | PE | 18:1/18:2  | 36:03 | 741.5309 | C41 H76 O8 N1 P1 | 11.607 | +H |
| PE(18:1/20:4)  | PE | 18:1/20:4  | 38:05 | 765.5309 | C43 H76 O8 N1 P1 | 11.355 | +H |
| PE(18:1/22:5)  | PE | 18:1/22:5  | 40:06 | 791.5465 | C45 H78 O8 N1 P1 | 11.431 | -H |
| PE(18:1p/16:0) | PE | 18:1p/16:0 | 34:1p | 701.5359 | C39 H76 O7 N1 P1 | 13.469 | +H |
| PE(18:1p/18:1) | PE | 18:1p/18:1 | 36:2p | 727.5516 | C41 H78 O7 N1 P1 | 13.528 | +H |
| PE(18:1p/18:2) | PE | 18:1p/18:2 | 36:3p | 725.5359 | C41 H76 O7 N1 P1 | 12.302 | +H |
| PE(18:1p/20:4) | PE | 18:1p/20:4 | 38:5p | 749.5359 | C43 H76 O7 N1 P1 | 12.113 | -H |
| PE(18:1p/22:4) | PE | 18:1p/22:4 | 40:5p | 777.5672 | C45 H80 O7 N1 P1 | 13.183 | +H |
| PE(18:2/18:2)  | PE | 18:2/18:2  | 36:04 | 739.5152 | C41 H74 O8 N1 P1 | 10.403 | +H |
| PE(18:2/22:6)  | PE | 18:2/22:6  | 40:08 | 787.5152 | C45 H74 O8 N1 P1 | 9.84   | +H |
| PE(18:3/18:2)  | PE | 18:3/18:2  | 36:05 | 737.4996 | C41 H72 O8 N1 P1 | 9.404  | -H |
| PE(18:3/20:4)  | PE | 18:3/20:4  | 38:07 | 761.4996 | C43 H72 O8 N1 P1 | 9.201  | +H |
| PE(19:0/18:2)  | PE | 19:0/18:2  | 37:02 | 757.5622 | C42 H80 O8 N1 P1 | 13.557 | -H |
| PE(19:0/20:4)  | PE | 19:0/20:4  | 39:04 | 781.5622 | C44 H80 O8 N1 P1 | 13.339 | -H |
| PE(19:0/22:6)  | PE | 19:0/22:6  | 41:06 | 805.5622 | C46 H80 O8 N1 P1 | 13.292 | -H |
| PE(20:0/20:4)  | PE | 20:0/20:4  | 40:04 | 795.5778 | C45 H82 O8 N1 P1 | 14.439 | +H |
| PE(20:0/22:6)  | PE | 20:0/22:6  | 42:06 | 819.5778 | C47 H82 O8 N1 P1 | 12.087 | -H |
| PE(20:0p/18:2) | PE | 20:0p/18:2 | 38:2p | 755.5829 | C43 H82 O7 N1 P1 | 15.395 | +H |
| PE(20:0p/20:4) | PE | 20:0p/20:4 | 40:4p | 779.5829 | C45 H82 O7 N1 P1 | 15.155 | +H |

Supplemental Tables for “Comprehensive untargeted lipidomic analysis using core-shell C30 particle column and high field orbitrap mass spectrometer”, by Mónica Narváez-Rivas and Qibin Zhang, *Journal of Chromatography A*.

|                |    |            |       |          |                   |        |    |
|----------------|----|------------|-------|----------|-------------------|--------|----|
| PE(20:0p/22:6) | PE | 20:0p/22:6 | 42:6p | 803.5829 | C47 H82 O7 N1 P1  | 14.771 | +H |
| PE(20:1/22:6)  | PE | 20:1/22:6  | 42:07 | 817.5622 | C47 H80 O8 N1 P1  | 12.466 | -H |
| PE(20:2/22:6)  | PE | 20:2/22:6  | 42:08 | 815.5465 | C47 H78 O8 N1 P1  | 11.225 | +H |
| PG(16:0,18:1)  | PG | 16:0/18:1  | 34:01 | 748.5254 | C40 H77 O10 N0 P1 | 11.632 | -H |
| PG(16:0,18:2)  | PG | 16:0/18:2  | 34:02 | 746.5098 | C40 H75 O10 N0 P1 | 10.601 | -H |
| PG(18:1,18:1)  | PG | 18:1/18:1  | 36:02 | 774.5411 | C42 H79 O10 N0 P1 | 10.84  | -H |
| PG(18:1,18:2)  | PG | 18:1/18:2  | 36:03 | 772.5254 | C42 H77 O10 N0 P1 | 9.752  | -H |
| PG(18:2,18:2)  | PG | 18:2/18:2  | 36:04 | 770.5098 | C42 H75 O10 N0 P1 | 8.714  | -H |
| PG(18:2,22:6)  | PG | 18:2/22:6  | 40:08 | 818.5098 | C46 H75 O10 N0 P1 | 8.264  | -H |
| PG(22:6,22:6)  | PG | 22:6/22:6  | 44:12 | 866.5098 | C50 H75 O10 N0 P1 | 7.859  | -H |
| PI(16:0,18:2)  | PI | 16:0/18:2  | 34:02 | 834.5258 | C43 H79 O13 N0 P1 | 10.238 | -H |
| PI(16:0,20:4)  | PI | 16:0/20:4  | 36:04 | 858.5258 | C45 H79 O13 N0 P1 | 10.06  | +H |
| PI(16:0,22:6)  | PI | 16:0/22:6  | 38:06 | 882.5258 | C47 H79 O13 N0 P1 | 9.724  | +H |
| PI(17:0,20:3)  | PI | 17:0/20:3  | 37:03 | 874.5571 | C46 H83 O13 N0 P1 | 11.424 | -H |
| PI(17:0,20:4)  | PI | 17:0/20:4  | 37:04 | 872.5415 | C46 H81 O13 N0 P1 | 10.867 | -H |
| PI(18:0,18:2)  | PI | 18:0/18:2  | 36:02 | 862.5571 | C45 H83 O13 N0 P1 | 11.789 | +H |
| PI(18:0,20:2)  | PI | 18:0/20:2  | 38:02 | 890.5884 | C47 H87 O13 N0 P1 | 13.119 | -H |
| PI(18:0,20:3)  | PI | 18:0/20:3  | 38:03 | 888.5728 | C47 H85 O13 N0 P1 | 12.198 | +H |
| PI(18:0,20:4)  | PI | 18:0/20:4  | 38:04 | 886.5571 | C47 H83 O13 N0 P1 | 11.597 | +H |
| PI(18:0,20:5)  | PI | 18:0/20:5  | 38:05 | 884.5415 | C47 H81 O13 N0 P1 | 10.67  | -H |
| PI(18:0,20:5)  | PI | 18:0/20:5  | 38:05 | 884.5415 | C47 H81 O13 N0 P1 | 11.275 | -H |
| PI(18:0,22:4)  | PI | 18:0/22:4  | 40:04 | 914.5884 | C49 H87 O13 N0 P1 | 12.648 | -H |
| PI(18:0,22:5)  | PI | 18:0/22:5  | 40:05 | 912.5728 | C49 H85 O13 N0 P1 | 11.69  | -H |
| PI(18:0,22:5)  | PI | 18:0/22:5  | 40:05 | 912.5728 | C49 H85 O13 N0 P1 | 12.217 | -H |
| PI(18:0,22:6)  | PI | 18:0/22:6  | 40:06 | 910.5571 | C49 H83 O13 N0 P1 | 11.264 | +H |
| PI(18:1,18:2)  | PI | 18:1/18:2  | 36:03 | 860.5415 | C45 H81 O13 N0 P1 | 10.356 | -H |
| PI(18:1,20:4)  | PI | 18:1/20:4  | 38:05 | 884.5415 | C47 H81 O13 N0 P1 | 10.157 | -H |
| PI(22:5,17:3)  | PI | 22:5/17:3  | 39:08 | 892.5102 | C48 H77 O13 N0 P1 | 11.588 | -H |
| PS(16:0,18:2)  | PS | 16:0/18:2  | 34:02 | 759.505  | C40 H74 O10 N1 P1 | 10.396 | -H |
| PS(16:0,20:4)  | PS | 16:0/20:4  | 36:04 | 783.505  | C42 H74 O10 N1 P1 | 10.211 | -H |
| PS(16:0,22:6)  | PS | 16:0/22:6  | 38:06 | 807.505  | C44 H74 O10 N1 P1 | 9.86   | -H |
| PS(17:0,20:4)  | PS | 17:0/20:4  | 37:04 | 797.5207 | C43 H76 O10 N1 P1 | 11     | +H |

|                    |    |                |       |          |                   |        |       |
|--------------------|----|----------------|-------|----------|-------------------|--------|-------|
| PS(17:0,22:6)      | PS | 17:0/22:6      | 39:06 | 821.5207 | C45 H76 O10 N1 P1 | 10.641 | +H    |
| PS(18:0,18:1)      | PS | 18:0/18:1      | 36:01 | 789.552  | C42 H80 O10 N1 P1 | 13.13  | -H    |
| PS(18:0,18:2)      | PS | 18:0/18:2      | 36:02 | 787.5363 | C42 H78 O10 N1 P1 | 11.967 | +H    |
| PS(18:0,20:4)      | PS | 18:0/20:4      | 38:04 | 811.5363 | C44 H78 O10 N1 P1 | 11.775 | -H    |
| PS(18:0,20:5)      | PS | 18:0/20:5      | 38:05 | 809.5207 | C44 H76 O10 N1 P1 | 10.86  | -H    |
| PS(18:0,22:5)      | PS | 18:0/22:5      | 40:05 | 837.552  | C46 H80 O10 N1 P1 | 11.854 | +H    |
| PS(18:0,22:6)      | PS | 18:0/22:6      | 40:06 | 835.5363 | C46 H78 O10 N1 P1 | 11.411 | +H    |
| PS(18:1,20:4)      | PS | 18:1/20:4      | 38:05 | 809.5207 | C44 H76 O10 N1 P1 | 10.302 | -H    |
| PS(18:2,18:2)      | PS | 18:2/18:2      | 36:04 | 783.505  | C42 H74 O10 N1 P1 | 11.506 | -H    |
| PS(19:0,20:4)      | PS | 19:0/20:4      | 39:04 | 825.552  | C45 H80 O10 N1 P1 | 12.597 | +H    |
| PS(20:4,20:4)      | PS | 20:4/20:4      | 40:08 | 831.505  | C46 H74 O10 N1 P1 | 8.933  | +H    |
| SM(d18:1/16:0)     | SM | d18:1/16:0     | d34:1 | 702.5676 | C39 H79 O6 N2 P1  | 10.463 | +HCOO |
| SM(d18:1/24:1)     | SM | d18:1/24:1     | d42:2 | 812.6771 | C47 H93 O6 N2 P1  | 15.525 | +H    |
| TG(10:0,18:2,18:2) | TG | 10:0/18:2/18:2 | 46:04 | 770.6424 | C49 H86 O6        | 17.759 | +NH4  |
| TG(10:0,18:2,18:3) | TG | 10:0/18:2/18:3 | 46:05 | 768.6268 | C49 H84 O6        | 17.16  | +NH4  |
| TG(10:0,18:2,20:4) | TG | 10:0/18:2/20:4 | 48:06 | 794.6424 | C51 H86 O6        | 17.375 | +NH4  |
| TG(12:0,18:2,18:2) | TG | 12:0/18:2/18:2 | 48:04 | 798.6737 | C51 H90 O6        | 18.46  | +NH4  |
| TG(12:0,18:2,22:6) | TG | 12:0/18:2/22:6 | 52:08 | 846.6737 | C55 H90 O6        | 18.276 | +NH4  |
| TG(14:0,18:2,18:3) | TG | 14:0/18:2/18:3 | 50:05 | 824.6894 | C53 H92 O6        | 18.654 | +NH4  |
| TG(15:0,14:0,16:0) | TG | 15:0/14:0/16:0 | 45:00 | 764.6894 | C48 H92 O6        | 19.762 | +NH4  |
| TG(15:0,14:1,18:2) | TG | 15:0/14:1/18:2 | 47:03 | 786.6737 | C50 H90 O6        | 18.703 | +NH4  |
| TG(15:0,16:0,16:1) | TG | 15:0/16:0/16:1 | 47:01 | 790.705  | C50 H94 O6        | 19.756 | +NH4  |
| TG(15:0,16:0,18:1) | TG | 15:0/16:0/18:1 | 49:01 | 818.7363 | C52 H98 O6        | 20.225 | +NH4  |
| TG(15:0,16:0,18:2) | TG | 15:0/16:0/18:2 | 49:02 | 816.7207 | C52 H96 O6        | 19.826 | +NH4  |
| TG(15:0,16:1,18:2) | TG | 15:0/16:1/18:2 | 49:03 | 814.705  | C52 H94 O6        | 19.306 | +NH4  |
| TG(15:0,18:2,18:2) | TG | 15:0/18:2/18:2 | 51:04 | 840.7207 | C54 H96 O6        | 19.382 | +NH4  |
| TG(15:0,18:2,18:3) | TG | 15:0/18:2/18:3 | 51:05 | 838.705  | C54 H94 O6        | 18.97  | +NH4  |
| TG(15:1,14:0,16:1) | TG | 15:1/14:0/16:1 | 45:02 | 760.6581 | C48 H88 O6        | 18.702 | +NH4  |
| TG(15:1,16:1,18:2) | TG | 15:1/16:1/18:2 | 49:04 | 812.6894 | C52 H92 O6        | 18.821 | +NH4  |
| TG(15:1,18:2,18:2) | TG | 15:1/18:2/18:2 | 51:05 | 838.705  | C54 H94 O6        | 18.829 | +NH4  |
| TG(15:1,18:2,18:3) | TG | 15:1/18:2/18:3 | 51:06 | 836.6894 | C54 H92 O6        | 18.373 | +NH4  |
| TG(16:0,10:0,18:1) | TG | 16:0/10:0/18:1 | 44:01 | 748.6581 | C47 H88 O6        | 18.933 | +NH4  |

Supplemental Tables for “Comprehensive untargeted lipidomic analysis using core-shell C30 particle column and high field orbitrap mass spectrometer”, by Mónica Narváez-Rivas and Qibin Zhang, *Journal of Chromatography A*.

|                     |    |                 |       |          |             |        |      |
|---------------------|----|-----------------|-------|----------|-------------|--------|------|
| TG(16:0,14:0,14:0)  | TG | 16:0/14:0/14:0  | 44:00 | 750.6737 | C47 H90 O6  | 19.502 | +NH4 |
| TG(16:0,14:0,16:0)  | TG | 16:0/14:0/16:0  | 46:00 | 778.705  | C49 H94 O6  | 20.004 | +NH4 |
| TG(16:0,14:0,16:1)  | TG | 16:0/14:0/16:1  | 46:01 | 776.6894 | C49 H92 O6  | 19.486 | +NH4 |
| TG(16:0,14:0,18:1)  | TG | 16:0/14:0/18:1  | 48:01 | 804.7207 | C51 H96 O6  | 19.993 | +NH4 |
| TG(16:0,16:0,16:0)  | TG | 16:0/16:0/16:0  | 48:00 | 806.7363 | C51 H98 O6  | 20.478 | +NH4 |
| TG(16:0,16:0,18:2)  | TG | 16:0/16:0/18:2  | 50:02 | 830.7363 | C53 H98 O6  | 20.087 | +NH4 |
| TG(16:0,16:0,18:3)  | TG | 16:0/16:0/18:3  | 50:03 | 828.7207 | C53 H96 O6  | 19.737 | +NH4 |
| TG(16:0,16:0,22:6)  | TG | 16:0/16:0/22:6  | 54:06 | 878.7363 | C57 H98 O6  | 19.752 | +NH4 |
| TG(16:0,16:1,18:2)  | TG | 16:0/16:1/18:2  | 50:03 | 828.7207 | C53 H96 O6  | 19.563 | +NH4 |
| TG(16:0,16:1,18:3)  | TG | 16:0/16:1/18:3  | 50:04 | 826.705  | C53 H94 O6  | 19.078 | +NH4 |
| TG(16:0,16:1,24:0)  | TG | 16:0/16:1/24:0  | 56:01 | 916.8459 | C59 H112 O6 | 21.609 | +NH4 |
| TG(16:0,17:0,18:1)  | TG | 16:0/17:0/18:1  | 51:01 | 846.7676 | C54 H102 O6 | 20.668 | +NH4 |
| TG(16:0,18:1,18:1)  | TG | 16:0/18:1/18:1  | 52:02 | 858.7676 | C55 H102 O6 | 20.43  | +NH4 |
| TG(16:0,18:1,18:2)  | TG | 16:0/18:1/18:2  | 52:03 | 856.752  | C55 H100 O6 | 20.054 | +NH4 |
| TG(16:0,18:1,18:3)  | TG | 16:0/18:1/18:3  | 52:04 | 854.7363 | C55 H98 O6  | 19.649 | +NH4 |
| TG(16:0,18:1,19:0)  | TG | 16:0/18:1/19:0  | 53:01 | 874.7989 | C56 H106 O6 | 20.961 | +NH4 |
| TG(16:0,18:1,20:4)  | TG | 16:0/18:1/20:4  | 54:05 | 880.752  | C57 H100 O6 | 19.905 | +NH4 |
| TG(16:0,18:2,18:3)  | TG | 16:0/18:2/18:3  | 52:05 | 852.7207 | C55 H96 O6  | 19.273 | +NH4 |
| TG(16:0,18:2,20:4)  | TG | 16:0/18:2/20:4  | 54:06 | 878.7363 | C57 H98 O6  | 19.477 | +NH4 |
| TG(16:0,18:2,21:0)  | TG | 16:0/18:2/21:0  | 55:02 | 900.8146 | C58 H108 O6 | 21.155 | +NH4 |
| TG(16:0,18:2,22:5)  | TG | 16:0/18:2/22:5  | 56:07 | 904.752  | C59 H100 O6 | 19.488 | +NH4 |
| TG(16:0,18:2,23:0)  | TG | 16:0/18:2/23:0  | 57:02 | 928.8459 | C60 H112 O6 | 21.481 | +NH4 |
| TG(16:0,20:3,22:6)  | TG | 16:0/20:3/22:6  | 58:09 | 928.752  | C61 H100 O6 | 19.278 | +NH4 |
| TG(16:0,8:0,18:1)   | TG | 16:0/8:0/18:1   | 42:01 | 720.6268 | C45 H84 O6  | 18.326 | +NH4 |
| TG(16:0e,16:0,18:2) | TG | 16:0e/16:0/18:2 | 50:2e | 816.7571 | C53 H100 O5 | 20.747 | +NH4 |
| TG(16:1,12:0,18:1)  | TG | 16:1/12:0/18:1  | 46:02 | 774.6737 | C49 H90 O6  | 18.997 | +NH4 |
| TG(16:1,12:0,18:2)  | TG | 16:1/12:0/18:2  | 46:03 | 772.6581 | C49 H88 O6  | 18.367 | +NH4 |
| TG(16:1,14:0,18:1)  | TG | 16:1/14:0/18:1  | 48:02 | 802.705  | C51 H94 O6  | 19.474 | +NH4 |
| TG(16:1,14:0,18:2)  | TG | 16:1/14:0/18:2  | 48:03 | 800.6894 | C51 H92 O6  | 19.003 | +NH4 |
| TG(16:1,18:2,18:2)  | TG | 16:1/18:2/18:2  | 52:05 | 852.7207 | C55 H96 O6  | 19.106 | +NH4 |
| TG(16:1,18:2,18:3)  | TG | 16:1/18:2/18:3  | 52:06 | 850.705  | C55 H94 O6  | 18.671 | +NH4 |
| TG(16:2,14:1,18:2)  | TG | 16:2/14:1/18:2  | 48:05 | 796.6581 | C51 H88 O6  | 17.97  | +NH4 |

|                     |    |                 |       |          |             |        |      |
|---------------------|----|-----------------|-------|----------|-------------|--------|------|
| TG(16:2,18:2,18:3)  | TG | 16:2/18:2/18:3  | 52:07 | 848.6894 | C55 H92 O6  | 18.196 | +NH4 |
| TG(16:2,18:3,18:3)  | TG | 16:2/18:3/18:3  | 52:08 | 846.6737 | C55 H90 O6  | 17.695 | +NH4 |
| TG(17:0,18:1,18:1)  | TG | 17:0/18:1/18:1  | 53:02 | 872.7833 | C56 H104 O6 | 20.627 | +NH4 |
| TG(17:0,18:2,18:2)  | TG | 17:0/18:2/18:2  | 53:04 | 868.752  | C56 H100 O6 | 19.909 | +NH4 |
| TG(17:4,16:1,20:4)  | TG | 17:4/16:1/20:4  | 53:09 | 858.6737 | C56 H90 O6  | 19.275 | +NH4 |
| TG(18:0,16:0,18:1)  | TG | 18:0/16:0/18:1  | 52:01 | 860.7833 | C55 H104 O6 | 20.877 | +NH4 |
| TG(18:0,16:0,19:0)  | TG | 18:0/16:0/19:0  | 53:00 | 876.8146 | C56 H108 O6 | 21.444 | +NH4 |
| TG(18:0,16:0,20:4)  | TG | 18:0/16:0/20:4  | 54:04 | 882.7676 | C57 H102 O6 | 20.39  | +NH4 |
| TG(18:0,16:0,24:1)  | TG | 18:0/16:0/24:1  | 58:01 | 944.8772 | C61 H116 O6 | 21.946 | +NH4 |
| TG(18:0,17:0,18:2)  | TG | 18:0/17:0/18:2  | 53:02 | 872.7833 | C56 H104 O6 | 20.745 | +NH4 |
| TG(18:0,18:0,18:1)  | TG | 18:0/18:0/18:1  | 54:01 | 888.8146 | C57 H108 O6 | 21.251 | +NH4 |
| TG(18:0,18:0,22:0)  | TG | 18:0/18:0/22:0  | 58:00 | 946.8928 | C61 H118 O6 | 22.157 | +NH4 |
| TG(18:0,18:1,18:2)  | TG | 18:0/18:1/18:2  | 54:03 | 884.7833 | C57 H104 O6 | 20.511 | +NH4 |
| TG(18:0,18:2,18:3)  | TG | 18:0/18:2/18:3  | 54:05 | 880.752  | C57 H100 O6 | 19.757 | +NH4 |
| TG(18:0,20:0,22:0)  | TG | 18:0/20:0/22:0  | 60:00 | 974.9241 | C63 H122 O6 | 22.536 | +NH4 |
| TG(18:0,20:4,20:4)  | TG | 18:0/20:4/20:4  | 58:08 | 930.7676 | C61 H102 O6 | 19.843 | +NH4 |
| TG(18:0,20:4,22:6)  | TG | 18:0/20:4/22:6  | 60:10 | 954.7676 | C63 H102 O6 | 19.687 | +NH4 |
| TG(18:0,22:0,22:0)  | TG | 18:0/22:0/22:0  | 62:00 | 1002.955 | C65 H126 O6 | 22.819 | +NH4 |
| TG(18:0e,16:0,18:0) | TG | 18:0e/16:0/18:0 | 52:0e | 848.8197 | C55 H108 O5 | 21.844 | +NH4 |
| TG(18:0e,16:0,22:4) | TG | 18:0e/16:0/22:4 | 56:4e | 896.8197 | C59 H108 O5 | 21.261 | +NH4 |
| TG(18:1,18:2,22:1)  | TG | 18:1/18:2/22:1  | 58:04 | 938.8302 | C61 H110 O6 | 20.893 | +NH4 |
| TG(18:2,13:1,18:2)  | TG | 18:2/13:1/18:2  | 49:05 | 810.6737 | C52 H90 O6  | 18.34  | +NH4 |
| TG(18:2,18:2,18:2)  | TG | 18:2/18:2/18:2  | 54:06 | 878.7363 | C57 H98 O6  | 22.369 | +NH4 |
| TG(18:2p,16:0,18:2) | TG | 18:2p/16:0/18:2 | 52:4p | 838.7414 | C55 H98 O5  | 20.058 | +NH4 |
| TG(18:2p,16:0,18:3) | TG | 18:2p/16:0/18:3 | 52:5p | 836.7258 | C55 H96 O5  | 19.65  | +NH4 |
| TG(18:3,14:1,18:2)  | TG | 18:3/14:1/18:2  | 50:06 | 822.6737 | C53 H90 O6  | 18.135 | +NH4 |
| TG(18:3,14:1,18:3)  | TG | 18:3/14:1/18:3  | 50:07 | 820.6581 | C53 H88 O6  | 17.604 | +NH4 |
| TG(18:3,17:1,18:2)  | TG | 18:3/17:1/18:2  | 53:06 | 864.7207 | C56 H96 O6  | 18.939 | +NH4 |
| TG(18:3,17:2,18:2)  | TG | 18:3/17:2/18:2  | 53:07 | 862.705  | C56 H94 O6  | 18.48  | +NH4 |
| TG(18:3,17:3,18:2)  | TG | 18:3/17:3/18:2  | 53:08 | 860.6894 | C56 H92 O6  | 18.008 | +NH4 |
| TG(18:3,18:2,18:2)  | TG | 18:3/18:2/18:2  | 54:07 | 876.7207 | C57 H96 O6  | 18.769 | +NH4 |
| TG(18:3,18:2,18:3)  | TG | 18:3/18:2/18:3  | 54:08 | 874.705  | C57 H94 O6  | 18.318 | +NH4 |

|                     |    |                 |       |          |             |        |      |
|---------------------|----|-----------------|-------|----------|-------------|--------|------|
| TG(18:3,18:2,20:5)  | TG | 18:3/18:2/20:5  | 56:10 | 898.705  | C59 H94 O6  | 18.101 | +NH4 |
| TG(18:3,18:2,21:5)  | TG | 18:3/18:2/21:5  | 57:10 | 912.7207 | C60 H96 O6  | 18.33  | +NH4 |
| TG(18:3,18:2,22:6)  | TG | 18:3/18:2/22:6  | 58:11 | 924.7207 | C61 H96 O6  | 18.354 | +NH4 |
| TG(18:3,18:3,20:5)  | TG | 18:3/18:3/20:5  | 56:11 | 896.6894 | C59 H92 O6  | 17.632 | +NH4 |
| TG(18:3,18:3,22:6)  | TG | 18:3/18:3/22:6  | 58:12 | 922.705  | C61 H94 O6  | 17.885 | +NH4 |
| TG(18:3,20:5,20:5)  | TG | 18:3/20:5/20:5  | 58:13 | 920.6894 | C61 H92 O6  | 17.318 | +NH4 |
| TG(18:3,20:5,22:6)  | TG | 18:3/20:5/22:6  | 60:14 | 946.705  | C63 H94 O6  | 17.611 | +NH4 |
| TG(18:4,16:0,20:5)  | TG | 18:4/16:0/20:5  | 54:09 | 872.6894 | C57 H92 O6  | 18.171 | +NH4 |
| TG(18:4,18:2,18:3)  | TG | 18:4/18:2/18:3  | 54:09 | 872.6894 | C57 H92 O6  | 17.858 | +NH4 |
| TG(19:0,18:1,18:1)  | TG | 19:0/18:1/18:1  | 55:02 | 900.8146 | C58 H108 O6 | 21.045 | +NH4 |
| TG(19:1,18:2,18:2)  | TG | 19:1/18:2/18:2  | 55:05 | 894.7676 | C58 H102 O6 | 19.876 | +NH4 |
| TG(19:2,18:2,20:5)  | TG | 19:2/18:2/20:5  | 57:09 | 914.7363 | C60 H98 O6  | 18.779 | +NH4 |
| TG(20:0,18:2,18:2)  | TG | 20:0/18:2/18:2  | 56:04 | 910.7989 | C59 H106 O6 | 20.584 | +NH4 |
| TG(20:0e,16:0,18:1) | TG | 20:0e/16:0/18:1 | 54:1e | 874.8353 | C57 H110 O5 | 21.809 | +NH4 |
| TG(20:1,18:1,18:3)  | TG | 20:1/18:1/18:3  | 56:05 | 908.7833 | C59 H104 O6 | 20.117 | +NH4 |
| TG(20:2,18:2,22:4)  | TG | 20:2/18:2/22:4  | 60:08 | 958.7989 | C63 H106 O6 | 19.931 | +NH4 |
| TG(20:5,17:1,18:2)  | TG | 20:5/17:1/18:2  | 55:08 | 888.7207 | C58 H96 O6  | 18.778 | +NH4 |
| TG(20:5,17:2,18:2)  | TG | 20:5/17:2/18:2  | 55:09 | 886.705  | C58 H94 O6  | 18.289 | +NH4 |
| TG(20:5,18:2,18:2)  | TG | 20:5/18:2/18:2  | 56:09 | 900.7207 | C59 H96 O6  | 18.576 | +NH4 |
| TG(20:5,18:2,22:6)  | TG | 20:5/18:2/22:6  | 60:13 | 948.7207 | C63 H96 O6  | 18.137 | +NH4 |
| TG(22:4,18:2,18:2)  | TG | 22:4/18:2/18:2  | 58:08 | 930.7676 | C61 H102 O6 | 19.419 | +NH4 |
| TG(24:1,18:2,20:4)  | TG | 24:1/18:2/20:4  | 62:07 | 988.8459 | C65 H112 O6 | 20.823 | +NH4 |
| TG(24:2,18:2,18:2)  | TG | 24:2/18:2/18:2  | 60:06 | 962.8302 | C63 H110 O6 | 20.677 | +NH4 |
| TG(25:0,14:0,16:0)  | TG | 25:0/14:0/16:0  | 55:00 | 904.8459 | C58 H112 O6 | 21.805 | +NH4 |
| TG(25:0,16:0,16:0)  | TG | 25:0/16:0/16:0  | 57:00 | 932.8772 | C60 H116 O6 | 22.092 | +NH4 |
| TG(25:0,16:0,18:1)  | TG | 25:0/16:0/18:1  | 59:01 | 958.8928 | C62 H118 O6 | 22.088 | +NH4 |
| TG(25:0,18:1,18:1)  | TG | 25:0/18:1/18:1  | 61:02 | 984.9085 | C64 H120 O6 | 22.071 | +NH4 |
| TG(25:0,18:2,18:2)  | TG | 25:0/18:2/18:2  | 61:04 | 980.8772 | C64 H116 O6 | 21.571 | +NH4 |
| TG(26:1,18:2,20:4)  | TG | 26:1/18:2/20:4  | 64:07 | 1016.877 | C67 H116 O6 | 21.203 | +NH4 |
| TG(28:1,16:0,18:1)  | TG | 28:1/16:0/18:1  | 62:02 | 998.9241 | C65 H122 O6 | 22.201 | +NH4 |
| TG(30:1,16:0,18:2)  | TG | 30:1/16:0/18:2  | 64:03 | 1024.94  | C67 H124 O6 | 22.232 | +NH4 |
| TG(30:1,18:1,20:2)  | TG | 30:1/18:1/20:2  | 68:04 | 1078.987 | C71 H130 O6 | 22.493 | +NH4 |

Supplemental Tables for “Comprehensive untargeted lipidomic analysis using core-shell C30 particle column and high field orbitrap mass spectrometer”, by Mónica Narváez-Rivas and Qibin Zhang, *Journal of Chromatography A*.

|                    |    |                |       |          |             |        |      |
|--------------------|----|----------------|-------|----------|-------------|--------|------|
| TG(30:1,18:2,18:2) | TG | 30:1/18:2/18:2 | 66:05 | 1048.94  | C69 H124 O6 | 21.985 | +NH4 |
| TG(4:0,16:0,16:0)  | TG | 4:0/16:0/16:0  | 36:00 | 638.5485 | C39 H74 O6  | 16.924 | +NH4 |
| TG(4:0,16:0,18:1)  | TG | 4:0/16:0/18:1  | 38:01 | 664.5642 | C41 H76 O6  | 16.922 | +NH4 |
| TG(4:0,16:0,18:2)  | TG | 4:0/16:0/18:2  | 38:02 | 662.5485 | C41 H74 O6  | 16.004 | +NH4 |
| TG(4:0,18:1,18:2)  | TG | 4:0/18:1/18:2  | 40:03 | 688.5642 | C43 H76 O6  | 16.013 | +NH4 |
| TG(4:0,18:2,18:2)  | TG | 4:0/18:2/18:2  | 40:04 | 686.5485 | C43 H74 O6  | 14.903 | +NH4 |
| TG(6:0,16:0,18:1)  | TG | 6:0/16:0/18:1  | 40:01 | 692.5955 | C43 H80 O6  | 17.663 | +NH4 |
| TG(8:0,18:1,18:2)  | TG | 8:0/18:1/18:2  | 44:03 | 744.6268 | C47 H84 O6  | 17.686 | +NH4 |
| TG(8:0,18:2,18:2)  | TG | 8:0/18:2/18:2  | 44:04 | 742.6111 | C47 H82 O6  | 16.945 | +NH4 |

Cer: ceramide, CL: cardiolipin, DG: diacylglycerol, LPC: lysophosphatidylcholine, LPE: lysophosphatidylethanolamine, LPG: lysophosphatidylglycerol, LPI: lysophosphatidylinositol, LPS: lysophosphatidylserine, PA: phosphatidic acid, PC: phosphatidylcholine, PE: phosphatidylethanolamine, PG: phosphatidylglycerol, PI: phosphatidylinositol, PS: phosphatidylserine, SM: sphingomyelin, TG: triacylglycerol

Table S6: Lipids identified in rat plasma by LC-MS/MS using the Accucore C30 column

| Lipid Molecule  | Class | Fatty acids (FA) | FA Group | Calc Mass | Formula       | Base Rt | Main Ion |
|-----------------|-------|------------------|----------|-----------|---------------|---------|----------|
| Cer(d15:0/26:1) | Cer   | d15:0/26:1       | d41:1    | 635.6216  | C41 H81 O3 N1 | 17.26   | -H       |
| Cer(d18:0/16:0) | Cer   | d18:0/16:0       | d34:0    | 539.5277  | C34 H69 O3 N1 | 12.776  | +H       |
| Cer(d18:0/22:0) | Cer   | d18:0/22:0       | d40:0    | 623.6216  | C40 H81 O3 N1 | 17.082  | +H       |
| Cer(d18:0/24:2) | Cer   | d18:0/24:2       | d42:2    | 647.6216  | C42 H81 O3 N1 | 16      | +H       |
| Cer(d18:1/16:0) | Cer   | d18:1/16:0       | d34:1    | 537.5121  | C34 H67 O3 N1 | 12.185  | +H       |
| Cer(d18:1/20:0) | Cer   | d18:1/20:0       | d38:1    | 593.5747  | C38 H75 O3 N1 | 15.42   | +H       |
| Cer(d18:1/22:0) | Cer   | d18:1/22:0       | d40:1    | 621.606   | C40 H79 O3 N1 | 16.714  | +H       |
| Cer(d18:1/24:0) | Cer   | d18:1/24:0       | d42:1    | 649.6373  | C42 H83 O3 N1 | 16.948  | +H       |
| Cer(d18:1/24:0) | Cer   | d18:1/24:0       | d42:1    | 649.6373  | C42 H83 O3 N1 | 17.549  | +H       |
| Cer(d18:1/24:1) | Cer   | d18:1/24:1       | d42:2    | 647.6216  | C42 H81 O3 N1 | 16.567  | +H       |
| Cer(d18:1/24:2) | Cer   | d18:1/24:2       | d42:3    | 645.606   | C42 H79 O3 N1 | 15.523  | +H       |
| Cer(d18:1/26:0) | Cer   | d18:1/26:0       | d44:1    | 677.6686  | C44 H87 O3 N1 | 18.523  | +H       |
| Cer(d18:1/26:1) | Cer   | d18:1/26:1       | d44:2    | 675.6529  | C44 H85 O3 N1 | 17.59   | +H       |
| DG(16:0,18:2)   | DG    | 16:0/18:2        | 34:02    | 592.5067  | C37 H68 O5    | 13.842  | +NH4     |
| DG(16:0,20:4)   | DG    | 16:0/20:4        | 36:04    | 616.5067  | C39 H68 O5    | 10.063  | +H       |
| DG(18:0,20:4)   | DG    | 18:0/20:4        | 38:04    | 644.538   | C41 H72 O5    | 11.606  | +H       |
| DG(18:1,18:2)   | DG    | 18:1/18:2        | 36:03    | 618.5223  | C39 H70 O5    | 13.915  | +NH4     |
| DG(18:1,18:3)   | DG    | 18:1/18:3        | 36:04    | 616.5067  | C39 H68 O5    | 19.173  | +H       |
| DG(18:1,20:4)   | DG    | 18:1/20:4        | 38:05    | 642.5223  | C41 H70 O5    | 13.541  | +NH4     |
| DG(18:2,18:2)   | DG    | 18:2/18:2        | 36:04    | 616.5067  | C39 H68 O5    | 12.709  | +NH4     |
| DG(18:2,18:2)   | DG    | 18:2/18:2        | 36:04    | 616.5067  | C39 H68 O5    | 17.808  | +H       |
| DG(18:2,20:4)   | DG    | 18:2/20:4        | 38:06    | 640.5067  | C41 H68 O5    | 12.315  | +NH4     |
| DG(18:2,22:6)   | DG    | 18:2/22:6        | 40:08    | 664.5067  | C43 H68 O5    | 11.902  | +NH4     |
| DG(18:3,18:2)   | DG    | 18:3/18:2        | 36:05    | 614.491   | C39 H66 O5    | 11.629  | +H       |
| DG(20:5,18:2)   | DG    | 20:5/18:2        | 38:07    | 638.491   | C41 H66 O5    | 11.291  | +NH4     |
| DG(22:4,18:2)   | DG    | 22:4/18:2        | 40:06    | 668.538   | C43 H72 O5    | 13.468  | +NH4     |
| DG(36:6,16:0)   | DG    | 36:6/16:0        | 52:06    | 836.7258  | C55 H96 O5    | 19.659  | +H       |



Supplemental Tables for “Comprehensive untargeted lipidomic analysis using core-shell C30 particle column and high field orbitrap mass spectrometer”, by Mónica Narváez-Rivas and Qibin Zhang, *Journal of Chromatography A*.

|                   |     |       |       |          |                  |       |    |
|-------------------|-----|-------|-------|----------|------------------|-------|----|
| LysoPC(0:0/15:0)  | LPC | 15:00 | 15:00 | 481.3168 | C23 H48 O7 N1 P1 | 1.858 | +H |
| LysoPC(15:0/0:0)  | LPC | 15:00 | 15:00 | 481.3168 | C23 H48 O7 N1 P1 | 2.019 | +H |
| LysoPC(15:1/0:0)  | LPC | 15:01 | 15:01 | 479.3012 | C23 H46 O7 N1 P1 | 2.791 | +H |
| LysoPC(15:2/0:0)  | LPC | 15:02 | 15:02 | 477.2855 | C23 H44 O7 N1 P1 | 2.083 | +H |
| LysoPC(0:0/16:0)  | LPC | 16:00 | 16:00 | 495.3325 | C24 H50 O7 N1 P1 | 2.263 | +H |
| LysoPC(16:0/0:0)  | LPC | 16:00 | 16:00 | 495.3325 | C24 H50 O7 N1 P1 | 2.471 | +H |
| LysoPC(16:1/0:0)  | LPC | 16:01 | 16:01 | 493.3168 | C24 H48 O7 N1 P1 | 1.812 | +H |
| LysoPC(16:1p/0:0) | LPC | 16:1p | 16:1p | 477.3219 | C24 H48 O6 N1 P1 | 2.265 | +H |
| LysoPC(0:0/17:0)  | LPC | 17:00 | 17:00 | 509.3481 | C25 H52 O7 N1 P1 | 2.603 | +H |
| LysoPC(17:0/0:0)  | LPC | 17:00 | 17:00 | 509.3481 | C25 H52 O7 N1 P1 | 3.07  | +H |
| LysoPC(17:2/0:0)  | LPC | 17:02 | 17:02 | 505.3168 | C25 H48 O7 N1 P1 | 1.677 | +H |
| LysoPC(17:4/0:0)  | LPC | 17:04 | 17:04 | 501.2855 | C25 H44 O7 N1 P1 | 1.903 | +H |
| LysoPC(0:0/18:0)  | LPC | 18:00 | 18:00 | 523.3638 | C26 H54 O7 N1 P1 | 3.296 | +H |
| LysoPC(18:0/0:0)  | LPC | 18:00 | 18:00 | 523.3638 | C26 H54 O7 N1 P1 | 3.826 | +H |
| LysoPC(0:0/18:0e) | LPC | 18:0e | 18:0e | 509.3845 | C26 H56 O6 N1 P1 | 4.605 | +H |
| LysoPC(0:0/18:0p) | LPC | 18:0p | 18:0p | 507.3689 | C26 H54 O6 N1 P1 | 3.152 | +H |
| LysoPC(18:0p/0:0) | LPC | 18:0p | 18:0p | 507.3689 | C26 H54 O6 N1 P1 | 4.455 | +H |
| LysoPC(0:0/18:1)  | LPC | 18:01 | 18:01 | 521.3481 | C26 H52 O7 N1 P1 | 2.422 | +H |
| LysoPC(18:1/0:0)  | LPC | 18:01 | 18:01 | 521.3481 | C26 H52 O7 N1 P1 | 2.644 | +H |
| LysoPC(0:0/18:1p) | LPC | 18:1p | 18:1p | 505.3532 | C26 H52 O6 N1 P1 | 2.316 | +H |
| LysoPC(18:1p/0:0) | LPC | 18:1p | 18:1p | 505.3532 | C26 H52 O6 N1 P1 | 3.061 | +H |
| LysoPC(0:0/18:2)  | LPC | 18:02 | 18:02 | 519.3325 | C26 H50 O7 N1 P1 | 1.855 | +H |
| LysoPC(18:2/0:0)  | LPC | 18:02 | 18:02 | 519.3325 | C26 H50 O7 N1 P1 | 1.995 | +H |
| LysoPC(18:2p/0:0) | LPC | 18:2p | 18:2p | 503.3376 | C26 H50 O6 N1 P1 | 2.269 | +H |
| LysoPC(0:0/18:3)  | LPC | 18:03 | 18:03 | 517.3168 | C26 H48 O7 N1 P1 | 1.471 | +H |
| LysoPC(0:0/19:0)  | LPC | 19:00 | 19:00 | 537.3794 | C27 H56 O7 N1 P1 | 3.973 | +H |
| LysoPC(19:0/0:0)  | LPC | 19:00 | 19:00 | 537.3794 | C27 H56 O7 N1 P1 | 4.359 | +H |
| LysoPC(0:0/19:1)  | LPC | 19:01 | 19:01 | 535.3638 | C27 H54 O7 N1 P1 | 2.978 | +H |
| LysoPC(19:2/0:0)  | LPC | 19:02 | 19:02 | 533.3481 | C27 H52 O7 N1 P1 | 2.382 | +H |
| LysoPC(0:0/20:0)  | LPC | 20:00 | 20:00 | 551.3951 | C28 H58 O7 N1 P1 | 4.859 | +H |
| LysoPC(20:0/0:0)  | LPC | 20:00 | 20:00 | 551.3951 | C28 H58 O7 N1 P1 | 5.455 | +H |
| LysoPC(0:0/20:0e) | LPC | 20:0e | 20:0e | 537.4158 | C28 H60 O6 N1 P1 | 6.656 | +H |

Supplemental Tables for “Comprehensive untargeted lipidomic analysis using core-shell C30 particle column and high field orbitrap mass spectrometer”, by Mónica Narváez-Rivas and Qibin Zhang, *Journal of Chromatography A*.

|                   |     |          |       |          |                  |       |    |
|-------------------|-----|----------|-------|----------|------------------|-------|----|
| LysoPC(0:0/20:0p) | LPC | 20:0p    | 20:0p | 535.4002 | C28 H58 O6 N1 P1 | 4.688 | +H |
| LysoPC(20:0p/0:0) | LPC | 20:0p    | 20:0p | 535.4002 | C28 H58 O6 N1 P1 | 6.527 | +H |
| LysoPC(0:0/20:1)  | LPC | 20:01    | 20:01 | 549.3794 | C28 H56 O7 N1 P1 | 3.629 | +H |
| LysoPC(20:1/0:0)  | LPC | 20:01    | 20:01 | 549.3794 | C28 H56 O7 N1 P1 | 3.935 | +H |
| LysoPC(0:0/20:1p) | LPC | 20:1p    | 20:1p | 533.3845 | C28 H56 O6 N1 P1 | 3.42  | +H |
| LysoPC(0:0/20:2)  | LPC | 20:02    | 20:02 | 547.3638 | C28 H54 O7 N1 P1 | 2.663 | +H |
| LysoPC(20:2/0:0)  | LPC | 20:02    | 20:02 | 547.3638 | C28 H54 O7 N1 P1 | 2.887 | +H |
| LysoPC(0:0/20:3)  | LPC | 20:03    | 20:03 | 545.3481 | C28 H52 O7 N1 P1 | 2.095 | +H |
| LysoPC(0:0/20:4)  | LPC | 20:04    | 20:04 | 543.3325 | C28 H50 O7 N1 P1 | 1.806 | +H |
| LysoPC(20:4/0:0)  | LPC | 20:04    | 20:04 | 543.3325 | C28 H50 O7 N1 P1 | 1.913 | +H |
| LysoPC(20:4/0:0)  | LPC | 20:04    | 20:04 | 543.3325 | C28 H50 O7 N1 P1 | 2.658 | +H |
| LysoPC(20:5/0:0)  | LPC | 20:05    | 20:05 | 541.3168 | C28 H48 O7 N1 P1 | 1.568 | +H |
| LysoPC(21:0/0:0)  | LPC | 21:00    | 21:00 | 565.4107 | C29 H60 O7 N1 P1 | 6.42  | +H |
| LysoPC(0:0/22:0)  | LPC | 22:00    | 22:00 | 579.4264 | C30 H62 O7 N1 P1 | 7.172 | +H |
| LysoPC(22:0/0:0)  | LPC | 22:00    | 22:00 | 579.4264 | C30 H62 O7 N1 P1 | 7.503 | +H |
| LysoPC(0:0/22:1)  | LPC | 22:01    | 22:01 | 577.4107 | C30 H60 O7 N1 P1 | 5.357 | +H |
| LysoPC(22:1/0:0)  | LPC | 22:01    | 22:01 | 577.4107 | C30 H60 O7 N1 P1 | 5.77  | +H |
| LysoPC(22:2/0:0)  | LPC | 22:02    | 22:02 | 575.3951 | C30 H58 O7 N1 P1 | 4.294 | +H |
| LysoPC(22:3/0:0)  | LPC | 22:03    | 22:03 | 573.3794 | C30 H56 O7 N1 P1 | 3.254 | +H |
| LysoPC(0:0/22:5)  | LPC | 22:05    | 22:05 | 569.3481 | C30 H52 O7 N1 P1 | 1.906 | +H |
| LysoPC(22:5/0:0)  | LPC | 22:05    | 22:05 | 569.3481 | C30 H52 O7 N1 P1 | 2.04  | +H |
| LysoPC(0:0/22:5)  | LPC | 22:05    | 22:05 | 569.3481 | C30 H52 O7 N1 P1 | 2.285 | +H |
| LysoPC(22:6/0:0)  | LPC | 22:06    | 22:06 | 567.3325 | C30 H50 O7 N1 P1 | 1.715 | +H |
| LysoPC(0:0/24:0)  | LPC | 24:00:00 | 24:00 | 607.4577 | C32 H66 O7 N1 P1 | 8.821 | +H |
| LysoPC(24:0/0:0)  | LPC | 24:00:00 | 24:00 | 607.4577 | C32 H66 O7 N1 P1 | 9.201 | +H |
| LysoPC(0:0/24:1)  | LPC | 24:01:00 | 24:01 | 605.442  | C32 H64 O7 N1 P1 | 7.107 | +H |
| LysoPC(24:1/0:0)  | LPC | 24:01:00 | 24:01 | 605.442  | C32 H64 O7 N1 P1 | 7.423 | +H |
| LysoPC(0:0/24:2)  | LPC | 24:02:00 | 24:02 | 603.4264 | C32 H62 O7 N1 P1 | 5.748 | +H |
| LysoPC(24:2/0:0)  | LPC | 24:02:00 | 24:02 | 603.4264 | C32 H62 O7 N1 P1 | 6.214 | +H |
| LysoPC(24:3/0:0)  | LPC | 24:03:00 | 24:03 | 601.4107 | C32 H60 O7 N1 P1 | 4.651 | +H |
| LysoPC(0:0/24:4)  | LPC | 24:04:00 | 24:04 | 599.3951 | C32 H58 O7 N1 P1 | 3.397 | +H |
| LysoPC(24:5/0:0)  | LPC | 24:05:00 | 24:05 | 597.3794 | C32 H56 O7 N1 P1 | 2.831 | +H |

Supplemental Tables for “Comprehensive untargeted lipidomic analysis using core-shell C30 particle column and high field orbitrap mass spectrometer”, by Mónica Narváez-Rivas and Qibin Zhang, *Journal of Chromatography A*.

|                  |     |            |       |          |                  |        |       |
|------------------|-----|------------|-------|----------|------------------|--------|-------|
| LysoPC(0:0/24:6) | LPC | 24:06:00   | 24:06 | 595.3638 | C32 H54 O7 N1 P1 | 2.213  | +H    |
| LysoPC(25:0/0:0) | LPC | 25:00:00   | 25:00 | 621.4733 | C33 H68 O7 N1 P1 | 10.105 | +H    |
| LysoPC(26:1/0:0) | LPC | 26:01:00   | 26:01 | 633.4733 | C34 H68 O7 N1 P1 | 9.067  | +H    |
| LysoPC(26:2/0:0) | LPC | 26:02:00   | 26:02 | 631.4577 | C34 H66 O7 N1 P1 | 7.53   | +H    |
| LysoPC(0:0/35:4) | LPC | 35:04:00   | 35:04 | 753.5672 | C43 H80 O7 N1 P1 | 10.993 | +H    |
| LysoPC(0:0/37:5) | LPC | 37:05:00   | 37:05 | 779.5829 | C45 H82 O7 N1 P1 | 12.343 | +H    |
| LysoPE(16:0)     | LPE | 16:00      | 16:00 | 453.2855 | C21 H44 O7 N1 P1 | 2.404  | +H    |
| LysoPE(18:0)     | LPE | 18:00      | 18:00 | 481.3168 | C23 H48 O7 N1 P1 | 3.714  | +H    |
| LysoPE(18:2)     | LPE | 18:02      | 18:02 | 477.2855 | C23 H44 O7 N1 P1 | 1.951  | +H    |
| LysoPE(20:4)     | LPE | 20:04      | 20:04 | 501.2855 | C25 H44 O7 N1 P1 | 1.906  | -H    |
| PC(15:0/18:1)    | PC  | 15:0/18:1  | 33:01 | 745.5622 | C41 H80 O8 N1 P1 | 11.483 | +HCOO |
| PC(15:0/20:2)    | PC  | 15:0/20:2  | 35:02 | 771.5778 | C43 H82 O8 N1 P1 | 14.401 | +H    |
| PC(15:0/20:3)    | PC  | 15:0/20:3  | 35:03 | 769.5622 | C43 H80 O8 N1 P1 | 13.474 | +H    |
| PC(15:1/18:2)    | PC  | 15:1/18:2  | 33:03 | 741.5309 | C41 H76 O8 N1 P1 | 11.596 | +H    |
| PC(16:0/16:0)    | PC  | 16:0/16:0  | 32:00 | 733.5622 | C40 H80 O8 N1 P1 | 11.854 | +HCOO |
| PC(16:0/18:1)    | PC  | 16:0/18:1  | 34:01 | 759.5778 | C42 H82 O8 N1 P1 | 12.251 | +HCOO |
| PC(16:0/18:2)    | PC  | 16:0/18:2  | 34:02 | 757.5622 | C42 H80 O8 N1 P1 | 11.075 | +HCOO |
| PC(16:0/20:3)    | PC  | 16:0/20:3  | 36:03 | 783.5778 | C44 H82 O8 N1 P1 | 11.678 | +HCOO |
| PC(16:0/20:4)    | PC  | 16:0/20:4  | 36:04 | 781.5622 | C44 H80 O8 N1 P1 | 12.253 | +H    |
| PC(16:0/22:4)    | PC  | 16:0/22:4  | 38:04 | 809.5935 | C46 H84 O8 N1 P1 | 11.941 | +HCOO |
| PC(16:0/22:5)    | PC  | 16:0/22:5  | 38:05 | 807.5778 | C46 H82 O8 N1 P1 | 11.488 | +HCOO |
| PC(16:0/22:6)    | PC  | 16:0/22:6  | 38:06 | 805.5622 | C46 H80 O8 N1 P1 | 10.369 | +HCOO |
| PC(16:0/24:7)    | PC  | 16:0/24:7  | 40:07 | 831.5778 | C48 H82 O8 N1 P1 | 10.186 | +H    |
| PC(16:0e/22:4)   | PC  | 16:0e/22:4 | 38:4e | 795.6142 | C46 H86 O7 N1 P1 | 12.905 | +HCOO |
| PC(16:0p/16:0)   | PC  | 16:0p/16:0 | 32:0p | 717.5672 | C40 H80 O7 N1 P1 | 12.887 | +HCOO |
| PC(16:0p/18:2)   | PC  | 16:0p/18:2 | 34:2p | 741.5672 | C42 H80 O7 N1 P1 | 11.809 | +HCOO |
| PC(16:1/20:4)    | PC  | 16:1/20:4  | 36:05 | 779.5465 | C44 H78 O8 N1 P1 | 9.494  | +HCOO |
| PC(17:0/18:1)    | PC  | 17:0/18:1  | 35:01 | 773.5935 | C43 H84 O8 N1 P1 | 13.035 | +HCOO |
| PC(17:0/18:2)    | PC  | 17:0/18:2  | 35:02 | 771.5778 | C43 H82 O8 N1 P1 | 11.881 | +HCOO |
| PC(17:1/18:2)    | PC  | 17:1/18:2  | 35:03 | 769.5622 | C43 H80 O8 N1 P1 | 10.437 | +HCOO |
| PC(17:4/18:0)    | PC  | 17:4/18:0  | 35:04 | 767.5465 | C43 H78 O8 N1 P1 | 12.867 | +H    |
| PC(18:0/15:2)    | PC  | 18:0/15:2  | 33:02 | 743.5465 | C41 H78 O8 N1 P1 | 13.09  | +H    |

|                |    |            |       |          |                  |        |       |
|----------------|----|------------|-------|----------|------------------|--------|-------|
| PC(18:0/17:2)  | PC | 18:0/17:2  | 35:02 | 771.5778 | C43 H82 O8 N1 P1 | 11.873 | +H    |
| PC(18:0/18:0)  | PC | 18:0/18:0  | 36:00 | 789.6248 | C44 H88 O8 N1 P1 | 15.166 | +HCOO |
| PC(18:0/18:1)  | PC | 18:0/18:1  | 36:01 | 787.6091 | C44 H86 O8 N1 P1 | 13.814 | +HCOO |
| PC(18:0/18:2)  | PC | 18:0/18:2  | 36:02 | 785.5935 | C44 H84 O8 N1 P1 | 12.676 | +HCOO |
| PC(18:0/20:3)  | PC | 18:0/20:3  | 38:03 | 811.6091 | C46 H86 O8 N1 P1 | 13.072 | +HCOO |
| PC(18:0/20:4)  | PC | 18:0/20:4  | 38:04 | 809.5935 | C46 H84 O8 N1 P1 | 12.464 | +HCOO |
| PC(18:0/22:4)  | PC | 18:0/22:4  | 40:04 | 837.6248 | C48 H88 O8 N1 P1 | 13.501 | +HCOO |
| PC(18:0/22:5)  | PC | 18:0/22:5  | 40:05 | 835.6091 | C48 H86 O8 N1 P1 | 13.048 | +HCOO |
| PC(18:0e/16:0) | PC | 18:0e/16:0 | 34:0e | 747.6142 | C42 H86 O7 N1 P1 | 14.681 | +HCOO |
| PC(18:0p/16:0) | PC | 18:0p/16:0 | 34:0p | 745.5985 | C42 H84 O7 N1 P1 | 13.154 | +HCOO |
| PC(18:0p/22:6) | PC | 18:0p/22:6 | 40:6p | 817.5985 | C48 H84 O7 N1 P1 | 11.491 | +HCOO |
| PC(18:1/14:0)  | PC | 18:1/14:0  | 32:01 | 731.5465 | C40 H78 O8 N1 P1 | 10.73  | +HCOO |
| PC(18:1/20:4)  | PC | 18:1/20:4  | 38:05 | 807.5778 | C46 H82 O8 N1 P1 | 10.402 | +H    |
| PC(18:1/23:4)  | PC | 18:1/23:4  | 41:05 | 849.6248 | C49 H88 O8 N1 P1 | 13.906 | +H    |
| PC(18:1/24:0)  | PC | 18:1/24:0  | 42:01 | 871.703  | C50 H98 O8 N1 P1 | 17.53  | +HCOO |
| PC(18:2/18:2)  | PC | 18:2/18:2  | 36:04 | 781.5622 | C44 H80 O8 N1 P1 | 10.019 | +HCOO |
| PC(18:2/20:4)  | PC | 18:2/20:4  | 38:06 | 805.5622 | C46 H80 O8 N1 P1 | 9.81   | +HCOO |
| PC(18:2/23:0)  | PC | 18:2/23:0  | 41:02 | 855.6717 | C49 H94 O8 N1 P1 | 16.343 | +HCOO |
| PC(18:2/23:5)  | PC | 18:2/23:5  | 41:07 | 845.5935 | C49 H84 O8 N1 P1 | 11.304 | +H    |
| PC(18:2p/18:2) | PC | 18:2p/18:2 | 36:4p | 765.5672 | C44 H80 O7 N1 P1 | 10.688 | +H    |
| PC(19:0/18:2)  | PC | 19:0/18:2  | 37:02 | 799.6091 | C45 H86 O8 N1 P1 | 13.473 | +HCOO |
| PC(19:0/20:4)  | PC | 19:0/20:4  | 39:04 | 823.6091 | C47 H86 O8 N1 P1 | 13.258 | +HCOO |
| PC(19:0/22:6)  | PC | 19:0/22:6  | 41:06 | 847.6091 | C49 H86 O8 N1 P1 | 12.549 | +HCOO |
| PC(19:2/18:2)  | PC | 19:2/18:2  | 37:04 | 795.5778 | C45 H82 O8 N1 P1 | 10.719 | +HCOO |
| PC(19:3/20:4)  | PC | 19:3/20:4  | 39:07 | 817.5622 | C47 H80 O8 N1 P1 | 9.861  | +H    |
| PC(20:0/22:6)  | PC | 20:0/22:6  | 42:06 | 861.6248 | C50 H88 O8 N1 P1 | 13.666 | +HCOO |
| PC(20:0e/16:0) | PC | 20:0e/16:0 | 36:0e | 775.6455 | C44 H90 O7 N1 P1 | 16.104 | +HCOO |
| PC(20:0e/18:2) | PC | 20:0e/18:2 | 38:2e | 799.6455 | C46 H90 O7 N1 P1 | 15.207 | +HCOO |
| PC(20:1/20:4)  | PC | 20:1/20:4  | 40:05 | 835.6091 | C48 H86 O8 N1 P1 | 12.41  | +HCOO |
| PC(20:1/22:6)  | PC | 20:1/22:6  | 42:07 | 859.6091 | C50 H86 O8 N1 P1 | 12.054 | +HCOO |
| PC(20:2/18:2)  | PC | 20:2/18:2  | 38:04 | 809.5935 | C46 H84 O8 N1 P1 | 11.419 | +HCOO |
| PC(20:2/22:6)  | PC | 20:2/22:6  | 42:08 | 857.5935 | C50 H84 O8 N1 P1 | 10.829 | +HCOO |

|                |    |            |       |          |                  |        |       |
|----------------|----|------------|-------|----------|------------------|--------|-------|
| PC(20:3/18:2)  | PC | 20:3/18:2  | 38:05 | 807.5778 | C46 H82 O8 N1 P1 | 10.423 | +HCOO |
| PC(20:3/22:5)  | PC | 20:3/22:5  | 42:08 | 857.5935 | C50 H84 O8 N1 P1 | 10.623 | +H    |
| PC(20:4/22:6)  | PC | 20:4/22:6  | 42:10 | 853.5622 | C50 H80 O8 N1 P1 | 9.185  | +HCOO |
| PC(22:0/18:2)  | PC | 22:0/18:2  | 40:02 | 841.6561 | C48 H92 O8 N1 P1 | 15.716 | +HCOO |
| PC(24:0/20:4)  | PC | 24:0/20:4  | 44:04 | 893.6874 | C52 H96 O8 N1 P1 | 16.722 | +HCOO |
| PC(24:2/18:2)  | PC | 24:2/18:2  | 42:04 | 865.6561 | C50 H92 O8 N1 P1 | 14.327 | +HCOO |
| PE(15:0/18:2)  | PE | 15:0/18:2  | 33:02 | 701.4996 | C38 H72 O8 N1 P1 | 10.68  | +H    |
| PE(16:0/18:1)  | PE | 16:0/18:1  | 34:01 | 717.5309 | C39 H76 O8 N1 P1 | 12.586 | +H    |
| PE(16:0/18:2)  | PE | 16:0/18:2  | 34:02 | 715.5152 | C39 H74 O8 N1 P1 | 11.483 | +H    |
| PE(16:0/18:3)  | PE | 16:0/18:3  | 34:03 | 713.4996 | C39 H72 O8 N1 P1 | 10.471 | -H    |
| PE(16:0/20:4)  | PE | 16:0/20:4  | 36:04 | 739.5152 | C41 H74 O8 N1 P1 | 11.268 | +H    |
| PE(16:0/22:6)  | PE | 16:0/22:6  | 38:06 | 763.5152 | C43 H74 O8 N1 P1 | 10.892 | +H    |
| PE(16:0p/18:2) | PE | 16:0p/18:2 | 34:2p | 699.5203 | C39 H74 O7 N1 P1 | 12.275 | +H    |
| PE(16:0p/20:3) | PE | 16:0p/20:3 | 36:3p | 725.5359 | C41 H76 O7 N1 P1 | 12.669 | -H    |
| PE(16:0p/20:4) | PE | 16:0p/20:4 | 36:4p | 723.5203 | C41 H74 O7 N1 P1 | 12.027 | -H    |
| PE(16:0p/22:4) | PE | 16:0p/22:4 | 38:4p | 751.5516 | C43 H78 O7 N1 P1 | 13.108 | -H    |
| PE(16:0p/22:5) | PE | 16:0p/22:5 | 38:5p | 749.5359 | C43 H76 O7 N1 P1 | 12.641 | -H    |
| PE(16:0p/22:6) | PE | 16:0p/22:6 | 38:6p | 747.5203 | C43 H74 O7 N1 P1 | 11.614 | -H    |
| PE(17:0/18:2)  | PE | 17:0/18:2  | 35:02 | 729.5309 | C40 H76 O8 N1 P1 | 12.293 | +H    |
| PE(17:0/20:4)  | PE | 17:0/20:4  | 37:04 | 753.5309 | C42 H76 O8 N1 P1 | 12.067 | +H    |
| PE(18:0/16:0)  | PE | 18:0/16:0  | 34:00 | 719.5465 | C39 H78 O8 N1 P1 | 14.104 | +H    |
| PE(18:0/18:1)  | PE | 18:0/18:1  | 36:01 | 745.5622 | C41 H80 O8 N1 P1 | 14.23  | +H    |
| PE(18:0/18:2)  | PE | 18:0/18:2  | 36:02 | 743.5465 | C41 H78 O8 N1 P1 | 13.091 | +H    |
| PE(18:0/20:3)  | PE | 18:0/20:3  | 38:03 | 769.5622 | C43 H80 O8 N1 P1 | 13.483 | -H    |
| PE(18:0/20:4)  | PE | 18:0/20:4  | 38:04 | 767.5465 | C43 H78 O8 N1 P1 | 12.867 | +H    |
| PE(18:0/22:4)  | PE | 18:0/22:4  | 40:04 | 795.5778 | C45 H82 O8 N1 P1 | 13.891 | +H    |
| PE(18:0/22:6)  | PE | 18:0/22:6  | 40:06 | 791.5465 | C45 H78 O8 N1 P1 | 12.491 | +H    |
| PE(18:0e/22:4) | PE | 18:0e/22:4 | 40:4e | 781.5985 | C45 H84 O7 N1 P1 | 14.896 | -H    |
| PE(18:0p/16:0) | PE | 18:0p/16:0 | 34:0p | 703.5516 | C39 H78 O7 N1 P1 | 14.913 | +H    |
| PE(18:0p/18:2) | PE | 18:0p/18:2 | 36:2p | 727.5516 | C41 H78 O7 N1 P1 | 12.592 | -H    |
| PE(18:0p/20:3) | PE | 18:0p/20:3 | 38:3p | 753.5672 | C43 H80 O7 N1 P1 | 14.226 | +H    |
| PE(18:0p/20:4) | PE | 18:0p/20:4 | 38:4p | 751.5516 | C43 H78 O7 N1 P1 | 13.612 | +H    |

Supplemental Tables for “Comprehensive untargeted lipidomic analysis using core-shell C30 particle column and high field orbitrap mass spectrometer”, by Mónica Narváez-Rivas and Qibin Zhang, *Journal of Chromatography A*.

|                |    |            |       |          |                    |        |    |
|----------------|----|------------|-------|----------|--------------------|--------|----|
| PE(18:0p/22:5) | PE | 18:0p/22:5 | 40:5p | 777.5672 | C45 H80 O7 N1 P1   | 13.683 | +H |
| PE(18:0p/22:6) | PE | 18:0p/22:6 | 40:6p | 775.5516 | C45 H78 O7 N1 P1   | 13.223 | -H |
| PE(18:1/18:1)  | PE | 18:1/18:1  | 36:02 | 743.5465 | C41 H78 O8 N1 P1   | 12.815 | +H |
| PE(18:1/18:2)  | PE | 18:1/18:2  | 36:03 | 741.5309 | C41 H76 O8 N1 P1   | 11.602 | -H |
| PE(18:1/20:4)  | PE | 18:1/20:4  | 38:05 | 765.5309 | C43 H76 O8 N1 P1   | 11.362 | +H |
| PE(18:1/22:6)  | PE | 18:1/22:6  | 40:07 | 789.5309 | C45 H76 O8 N1 P1   | 10.983 | +H |
| PE(18:1p/16:0) | PE | 18:1p/16:0 | 34:1p | 701.5359 | C39 H76 O7 N1 P1   | 13.46  | +H |
| PE(18:1p/18:1) | PE | 18:1p/18:1 | 36:2p | 727.5516 | C41 H78 O7 N1 P1   | 13.556 | +H |
| PE(18:1p/18:2) | PE | 18:1p/18:2 | 36:3p | 725.5359 | C41 H76 O7 N1 P1   | 12.292 | +H |
| PE(18:1p/20:4) | PE | 18:1p/20:4 | 38:5p | 749.5359 | C43 H76 O7 N1 P1   | 12.114 | -H |
| PE(18:1p/22:4) | PE | 18:1p/22:4 | 40:5p | 777.5672 | C45 H80 O7 N1 P1   | 13.186 | -H |
| PE(18:1p/22:6) | PE | 18:1p/22:6 | 40:7p | 773.5359 | C45 H76 O7 N1 P1   | 11.709 | -H |
| PE(18:2/18:2)  | PE | 18:2/18:2  | 36:04 | 739.5152 | C41 H74 O8 N1 P1   | 10.4   | +H |
| PE(18:2/20:4)  | PE | 18:2/20:4  | 38:06 | 763.5152 | C43 H74 O8 N1 P1   | 10.172 | +H |
| PE(18:2p/18:2) | PE | 18:2p/18:2 | 36:4p | 723.5203 | C41 H74 O7 N1 P1   | 11.162 | -H |
| PE(18:2p/20:4) | PE | 18:2p/20:4 | 38:6p | 747.5203 | C43 H74 O7 N1 P1   | 10.895 | +H |
| PE(18:3/18:2)  | PE | 18:3/18:2  | 36:05 | 737.4996 | C41 H72 O8 N1 P1   | 9.388  | +H |
| PE(20:0e/16:0) | PE | 20:0e/16:0 | 36:0e | 733.5985 | C41 H84 O7 N1 P1   | 16.471 | -H |
| PE(20:0e/18:2) | PE | 20:0e/18:2 | 38:2e | 757.5985 | C43 H84 O7 N1 P1   | 15.646 | -H |
| PE(20:0p/16:0) | PE | 20:0p/16:0 | 36:0p | 731.5829 | C41 H82 O7 N1 P1   | 13.156 | -H |
| PE(20:0p/18:2) | PE | 20:0p/18:2 | 38:2p | 755.5829 | C43 H82 O7 N1 P1   | 15.387 | +H |
| PE(20:0p/20:4) | PE | 20:0p/20:4 | 40:4p | 779.5829 | C45 H82 O7 N1 P1   | 15.151 | +H |
| PE(20:0p/22:5) | PE | 20:0p/22:5 | 42:5p | 805.5985 | C47 H84 O7 N1 P1   | 15.205 | -H |
| PE(20:0p/22:6) | PE | 20:0p/22:6 | 42:6p | 803.5829 | C47 H82 O7 N1 P1   | 14.762 | +H |
| PE(20:2/18:2)  | PE | 20:2/18:2  | 38:04 | 767.5465 | C43 H78 O8 N1 P1   | 11.825 | -H |
| PE(20:4/20:4)  | PE | 20:4/20:4  | 40:08 | 787.5152 | C45 H74 O8 N1 P1   | 9.872  | +H |
| PG(28:0/18:2)  | PG | 28:0/18:2  | 46:02 | 914.6976 | C52 H99 O10 N0 P1  | 17.029 | -H |
| PG(30:0/18:2)  | PG | 30:0/18:2  | 48:02 | 942.7289 | C54 H103 O10 N0 P1 | 16.747 | -H |
| PI(16:0,16:0)  | PI | 16:0/16:0  | 32:00 | 810.5258 | C41 H79 O13 N0 P1  | 11.222 | -H |
| PI(16:0,18:1)  | PI | 16:0/18:1  | 34:01 | 836.5415 | C43 H81 O13 N0 P1  | 11.38  | -H |
| PI(16:0,20:4)  | PI | 16:0/20:4  | 36:04 | 858.5258 | C45 H79 O13 N0 P1  | 10.06  | +H |
| PI(18:0,18:2)  | PI | 18:0/18:2  | 36:02 | 862.5571 | C45 H83 O13 N0 P1  | 11.788 | +H |

|                    |    |                |       |          |                   |        |      |
|--------------------|----|----------------|-------|----------|-------------------|--------|------|
| PI(18:0,20:2)      | PI | 18:0/20:2      | 38:02 | 890.5884 | C47 H87 O13 N0 P1 | 13.108 | -H   |
| PI(18:0,20:3)      | PI | 18:0/20:3      | 38:03 | 888.5728 | C47 H85 O13 N0 P1 | 12.19  | +H   |
| PI(18:0,20:4)      | PI | 18:0/20:4      | 38:04 | 886.5571 | C47 H83 O13 N0 P1 | 11.61  | +H   |
| PI(18:0,20:5)      | PI | 18:0/20:5      | 38:05 | 884.5415 | C47 H81 O13 N0 P1 | 10.666 | -H   |
| PI(18:0,22:4)      | PI | 18:0/22:4      | 40:04 | 914.5884 | C49 H87 O13 N0 P1 | 12.637 | -H   |
| PI(18:0,22:6)      | PI | 18:0/22:6      | 40:06 | 910.5571 | C49 H83 O13 N0 P1 | 11.262 | +H   |
| PI(18:1,18:1)      | PI | 18:1/18:1      | 36:02 | 862.5571 | C45 H83 O13 N0 P1 | 11.533 | -H   |
| PI(18:1,18:2)      | PI | 18:1/18:2      | 36:03 | 860.5415 | C45 H81 O13 N0 P1 | 10.371 | -H   |
| PI(18:1,20:4)      | PI | 18:1/20:4      | 38:05 | 884.5415 | C47 H81 O13 N0 P1 | 10.186 | -H   |
| PS(18:0,18:1)      | PS | 18:0/18:1      | 36:01 | 789.552  | C42 H80 O10 N1 P1 | 13.13  | -H   |
| PS(18:0,18:2)      | PS | 18:0/18:2      | 36:02 | 787.5363 | C42 H78 O10 N1 P1 | 11.981 | -H   |
| PS(18:0,20:4)      | PS | 18:0/20:4      | 38:04 | 811.5363 | C44 H78 O10 N1 P1 | 11.789 | -H   |
| PS(20:4,20:4)      | PS | 20:4/20:4      | 40:08 | 831.505  | C46 H74 O10 N1 P1 | 8.934  | +H   |
| SM(d18:1/24:2)     | SM | d18:1/24:2     | d42:3 | 810.6615 | C47 H91 O6 N2 P1  | 13.889 | +H   |
| So(d18:0)          | So | d18:0          | d18:0 | 301.2981 | C18 H39 O2 N1     | 2.126  | +H   |
| So(d18:1)          | So | d18:1          | d18:1 | 299.2824 | C18 H37 O2 N1     | 1.898  | +H   |
| TG(10:0,18:1,18:1) | TG | 10:0/18:1/18:1 | 46:02 | 774.6737 | C49 H90 O6        | 18.999 | +NH4 |
| TG(10:0,18:1,18:2) | TG | 10:0/18:1/18:2 | 46:03 | 772.6581 | C49 H88 O6        | 18.383 | +NH4 |
| TG(10:0,18:2,18:2) | TG | 10:0/18:2/18:2 | 46:04 | 770.6424 | C49 H86 O6        | 17.751 | +NH4 |
| TG(10:0,18:2,18:3) | TG | 10:0/18:2/18:3 | 46:05 | 768.6268 | C49 H84 O6        | 17.144 | +NH4 |
| TG(11:0,18:1,18:2) | TG | 11:0/18:1/18:2 | 47:03 | 786.6737 | C50 H90 O6        | 18.694 | +NH4 |
| TG(12:0,18:2,18:2) | TG | 12:0/18:2/18:2 | 48:04 | 798.6737 | C51 H90 O6        | 18.464 | +NH4 |
| TG(12:0,18:2,18:3) | TG | 12:0/18:2/18:3 | 48:05 | 796.6581 | C51 H88 O6        | 17.949 | +NH4 |
| TG(12:0,18:3,18:3) | TG | 12:0/18:3/18:3 | 48:06 | 794.6424 | C51 H86 O6        | 17.351 | +NH4 |
| TG(14:0,18:2,18:2) | TG | 14:0/18:2/18:2 | 50:04 | 826.705  | C53 H94 O6        | 19.083 | +NH4 |
| TG(14:0,18:2,18:3) | TG | 14:0/18:2/18:3 | 50:05 | 824.6894 | C53 H92 O6        | 18.655 | +NH4 |
| TG(14:0,18:2,20:5) | TG | 14:0/18:2/20:5 | 52:07 | 848.6894 | C55 H92 O6        | 18.456 | +NH4 |
| TG(15:0,12:0,18:2) | TG | 15:0/12:0/18:2 | 45:02 | 760.6581 | C48 H88 O6        | 18.696 | +NH4 |
| TG(15:0,14:0,16:0) | TG | 15:0/14:0/16:0 | 45:00 | 764.6894 | C48 H92 O6        | 19.759 | +NH4 |
| TG(15:0,14:0,18:1) | TG | 15:0/14:0/18:1 | 47:01 | 790.705  | C50 H94 O6        | 19.757 | +NH4 |

Supplemental Tables for “Comprehensive untargeted lipidomic analysis using core-shell C30 particle column and high field orbitrap mass spectrometer”, by Mónica Narváez-Rivas and Qibin Zhang, *Journal of Chromatography A*.

|                    |    |                |       |          |             |        |      |
|--------------------|----|----------------|-------|----------|-------------|--------|------|
| TG(15:0,14:0,18:2) | TG | 15:0/14:0/18:2 | 47:02 | 788.6894 | C50 H92 O6  | 19.295 | +NH4 |
| TG(15:0,16:0,18:1) | TG | 15:0/16:0/18:1 | 49:01 | 818.7363 | C52 H98 O6  | 20.223 | +NH4 |
| TG(15:0,16:0,18:2) | TG | 15:0/16:0/18:2 | 49:02 | 816.7207 | C52 H96 O6  | 19.723 | +NH4 |
| TG(15:0,16:1,18:2) | TG | 15:0/16:1/18:2 | 49:03 | 814.705  | C52 H94 O6  | 19.31  | +NH4 |
| TG(15:0,18:1,18:2) | TG | 15:0/18:1/18:2 | 51:03 | 842.7363 | C54 H98 O6  | 19.805 | +NH4 |
| TG(15:0,18:2,18:2) | TG | 15:0/18:2/18:2 | 51:04 | 840.7207 | C54 H96 O6  | 19.376 | +NH4 |
| TG(15:1,18:2,18:2) | TG | 15:1/18:2/18:2 | 51:05 | 838.705  | C54 H94 O6  | 18.83  | +NH4 |
| TG(15:1,18:2,18:3) | TG | 15:1/18:2/18:3 | 51:06 | 836.6894 | C54 H92 O6  | 18.364 | +NH4 |
| TG(16:0,10:0,18:1) | TG | 16:0/10:0/18:1 | 44:01 | 748.6581 | C47 H88 O6  | 18.936 | +NH4 |
| TG(16:0,10:0,18:2) | TG | 16:0/10:0/18:2 | 44:02 | 746.6424 | C47 H86 O6  | 18.383 | +NH4 |
| TG(16:0,12:0,16:0) | TG | 16:0/12:0/16:0 | 44:00 | 750.6737 | C47 H90 O6  | 19.503 | +NH4 |
| TG(16:0,12:0,18:1) | TG | 16:0/12:0/18:1 | 46:01 | 776.6894 | C49 H92 O6  | 19.486 | +NH4 |
| TG(16:0,14:0,16:0) | TG | 16:0/14:0/16:0 | 46:00 | 778.705  | C49 H94 O6  | 20.005 | +NH4 |
| TG(16:0,14:0,18:1) | TG | 16:0/14:0/18:1 | 48:01 | 804.7207 | C51 H96 O6  | 19.983 | +NH4 |
| TG(16:0,14:0,22:6) | TG | 16:0/14:0/22:6 | 52:06 | 850.705  | C55 H94 O6  | 18.877 | +NH4 |
| TG(16:0,16:0,18:1) | TG | 16:0/16:0/18:1 | 50:01 | 832.752  | C53 H100 O6 | 20.336 | +NH4 |
| TG(16:0,16:0,18:1) | TG | 16:0/16:0/18:1 | 50:01 | 832.752  | C53 H100 O6 | 20.456 | +NH4 |
| TG(16:0,16:0,18:2) | TG | 16:0/16:0/18:2 | 50:02 | 830.7363 | C53 H98 O6  | 19.28  | +NH4 |
| TG(16:0,16:0,18:2) | TG | 16:0/16:0/18:2 | 50:02 | 830.7363 | C53 H98 O6  | 20.09  | +NH4 |
| TG(16:0,16:0,21:0) | TG | 16:0/16:0/21:0 | 53:00 | 876.8146 | C56 H108 O6 | 21.38  | +NH4 |
| TG(16:0,16:1,18:1) | TG | 16:0/16:1/18:1 | 50:02 | 830.7363 | C53 H98 O6  | 19.971 | +NH4 |
| TG(16:0,16:1,18:2) | TG | 16:0/16:1/18:2 | 50:03 | 828.7207 | C53 H96 O6  | 17.787 | +NH4 |
| TG(16:0,16:1,18:3) | TG | 16:0/16:1/18:3 | 50:04 | 826.705  | C53 H94 O6  | 17.257 | +NH4 |
| TG(16:0,17:0,18:1) | TG | 16:0/17:0/18:1 | 51:01 | 846.7676 | C54 H102 O6 | 20.664 | +NH4 |
| TG(16:0,18:1,18:1) | TG | 16:0/18:1/18:1 | 52:02 | 858.7676 | C55 H102 O6 | 18.737 | +NH4 |
| TG(16:0,18:1,18:1) | TG | 16:0/18:1/18:1 | 52:02 | 858.7676 | C55 H102 O6 | 20.424 | +NH4 |
| TG(16:0,18:1,18:2) | TG | 16:0/18:1/18:2 | 52:03 | 856.752  | C55 H100 O6 | 18.239 | +NH4 |
| TG(16:0,18:1,18:2) | TG | 16:0/18:1/18:2 | 52:03 | 856.752  | C55 H100 O6 | 20.054 | +NH4 |



Supplemental Tables for “Comprehensive untargeted lipidomic analysis using core-shell C30 particle column and high field orbitrap mass spectrometer”, by Mónica Narváez-Rivas and Qibin Zhang, *Journal of Chromatography A*.

|                     |    |                 |       |          |             |        |      |
|---------------------|----|-----------------|-------|----------|-------------|--------|------|
| TG(16:0,18:1,18:3)  | TG | 16:0/18:1/18:3  | 52:04 | 854.7363 | C55 H98 O6  | 19.648 | +NH4 |
| TG(16:0,18:1,20:4)  | TG | 16:0/18:1/20:4  | 54:05 | 880.752  | C57 H100 O6 | 19.898 | +NH4 |
| TG(16:0,18:1,22:0)  | TG | 16:0/18:1/22:0  | 56:01 | 916.8459 | C59 H112 O6 | 21.592 | +NH4 |
| TG(16:0,18:2,18:2)  | TG | 16:0/18:2/18:2  | 52:04 | 854.7363 | C55 H98 O6  | 25.07  | +NH4 |
| TG(16:0,18:2,18:3)  | TG | 16:0/18:2/18:3  | 52:05 | 852.7207 | C55 H96 O6  | 17.465 | +NH4 |
| TG(16:0,18:2,18:3)  | TG | 16:0/18:2/18:3  | 52:05 | 852.7207 | C55 H96 O6  | 19.271 | +NH4 |
| TG(16:0,18:2,20:4)  | TG | 16:0/18:2/20:4  | 54:06 | 878.7363 | C57 H98 O6  | 19.474 | +NH4 |
| TG(16:0,18:2,21:0)  | TG | 16:0/18:2/21:0  | 55:02 | 900.8146 | C58 H108 O6 | 21.052 | +NH4 |
| TG(16:0,18:2,22:4)  | TG | 16:0/18:2/22:4  | 56:06 | 906.7676 | C59 H102 O6 | 19.851 | +NH4 |
| TG(16:0,18:2,22:6)  | TG | 16:0/18:2/22:6  | 56:08 | 902.7363 | C59 H98 O6  | 19.289 | +NH4 |
| TG(16:0,20:1,21:0)  | TG | 16:0/20:1/21:0  | 57:01 | 930.8615 | C60 H114 O6 | 21.738 | +NH4 |
| TG(16:0,20:1,23:0)  | TG | 16:0/20:1/23:0  | 59:01 | 958.8928 | C62 H118 O6 | 22.074 | +NH4 |
| TG(16:0,22:4,22:4)  | TG | 16:0/22:4/22:4  | 60:08 | 958.7989 | C63 H106 O6 | 20.186 | +NH4 |
| TG(16:0,22:5,22:6)  | TG | 16:0/22:5/22:6  | 60:11 | 952.752  | C63 H100 O6 | 19.099 | +NH4 |
| TG(16:0,8:0,18:2)   | TG | 16:0/8:0/18:2   | 42:02 | 718.6111 | C45 H82 O6  | 17.692 | +NH4 |
| TG(16:0e,16:0,18:2) | TG | 16:0e/16:0/18:2 | 50:2e | 816.7571 | C53 H100 O5 | 20.651 | +NH4 |
| TG(16:1,14:0,18:1)  | TG | 16:1/14:0/18:1  | 48:02 | 802.705  | C51 H94 O6  | 19.56  | +NH4 |
| TG(16:1,18:2,18:3)  | TG | 16:1/18:2/18:3  | 52:06 | 850.705  | C55 H94 O6  | 18.666 | +NH4 |
| TG(16:2,18:2,18:3)  | TG | 16:2/18:2/18:3  | 52:07 | 848.6894 | C55 H92 O6  | 18.19  | +NH4 |
| TG(17:0,18:1,18:1)  | TG | 17:0/18:1/18:1  | 53:02 | 872.7833 | C56 H104 O6 | 20.645 | +NH4 |
| TG(17:0,18:1,18:2)  | TG | 17:0/18:1/18:2  | 53:03 | 870.7676 | C56 H102 O6 | 20.194 | +NH4 |
| TG(17:0,18:2,18:2)  | TG | 17:0/18:2/18:2  | 53:04 | 868.752  | C56 H100 O6 | 19.901 | +NH4 |
| TG(17:4,16:1,20:4)  | TG | 17:4/16:1/20:4  | 53:09 | 858.6737 | C56 H90 O6  | 19.268 | +NH4 |
| TG(18:0,16:0,16:0)  | TG | 18:0/16:0/16:0  | 50:00 | 834.7676 | C53 H102 O6 | 20.897 | +NH4 |
| TG(18:0,16:0,17:0)  | TG | 18:0/16:0/17:0  | 51:00 | 848.7833 | C54 H104 O6 | 21.041 | +NH4 |
| TG(18:0,16:0,18:0)  | TG | 18:0/16:0/18:0  | 52:00 | 862.7989 | C55 H106 O6 | 21.282 | +NH4 |
| TG(18:0,16:0,18:1)  | TG | 18:0/16:0/18:1  | 52:01 | 860.7833 | C55 H104 O6 | 20.746 | +NH4 |
| TG(18:0,16:0,20:0)  | TG | 18:0/16:0/20:0  | 54:00 | 890.8302 | C57 H110 O6 | 21.626 | +NH4 |

Supplemental Tables for “Comprehensive untargeted lipidomic analysis using core-shell C30 particle column and high field orbitrap mass spectrometer”, by Mónica Narváez-Rivas and Qibin Zhang, *Journal of Chromatography A*.

|                     |    |                 |       |          |             |        |      |
|---------------------|----|-----------------|-------|----------|-------------|--------|------|
| TG(18:0,16:0,21:0)  | TG | 18:0/16:0/21:0  | 55:00 | 904.8459 | C58 H112 O6 | 21.749 | +NH4 |
| TG(18:0,17:0,18:2)  | TG | 18:0/17:0/18:2  | 53:02 | 872.7833 | C56 H104 O6 | 20.751 | +NH4 |
| TG(18:0,20:4,20:5)  | TG | 18:0/20:4/20:5  | 58:09 | 928.752  | C61 H100 O6 | 19.501 | +NH4 |
| TG(18:0,20:4,22:6)  | TG | 18:0/20:4/22:6  | 60:10 | 954.7676 | C63 H102 O6 | 19.677 | +NH4 |
| TG(18:0,22:0,22:0)  | TG | 18:0/22:0/22:0  | 62:00 | 1002.955 | C65 H126 O6 | 22.824 | +NH4 |
| TG(18:0p,18:2,18:2) | TG | 18:0p/18:2/18:2 | 54:4p | 866.7727 | C57 H102 O5 | 20.312 | +NH4 |
| TG(18:1,12:0,18:2)  | TG | 18:1/12:0/18:2  | 48:03 | 800.6894 | C51 H92 O6  | 18.999 | +NH4 |
| TG(18:1,14:0,18:2)  | TG | 18:1/14:0/18:2  | 50:03 | 828.7207 | C53 H96 O6  | 19.552 | +NH4 |
| TG(18:1,18:1,18:1)  | TG | 18:1/18:1/18:1  | 54:03 | 884.7833 | C57 H104 O6 | 20.492 | +NH4 |
| TG(18:1,18:2,18:3)  | TG | 18:1/18:2/18:3  | 54:06 | 878.7363 | C57 H98 O6  | 17.453 | +NH4 |
| TG(18:1,18:2,18:3)  | TG | 18:1/18:2/18:3  | 54:06 | 878.7363 | C57 H98 O6  | 19.181 | +NH4 |
| TG(18:1,18:2,20:4)  | TG | 18:1/18:2/20:4  | 56:07 | 904.752  | C59 H100 O6 | 19.481 | +NH4 |
| TG(18:1,18:2,23:0)  | TG | 18:1/18:2/23:0  | 59:03 | 954.8615 | C62 H114 O6 | 21.477 | +NH4 |
| TG(18:1,18:2,24:1)  | TG | 18:1/18:2/24:1  | 60:04 | 966.8615 | C63 H114 O6 | 21.24  | +NH4 |
| TG(18:1,18:3,22:6)  | TG | 18:1/18:3/22:6  | 58:10 | 926.7363 | C61 H98 O6  | 18.802 | +NH4 |
| TG(18:1,18:3,24:1)  | TG | 18:1/18:3/24:1  | 60:05 | 964.8459 | C63 H112 O6 | 20.946 | +NH4 |
| TG(18:2,17:2,18:2)  | TG | 18:2/17:2/18:2  | 53:06 | 864.7207 | C56 H96 O6  | 18.929 | +NH4 |
| TG(18:2,17:2,22:6)  | TG | 18:2/17:2/22:6  | 57:10 | 912.7207 | C60 H96 O6  | 18.509 | +NH4 |
| TG(18:2,18:2,18:2)  | TG | 18:2/18:2/18:2  | 54:06 | 878.7363 | C57 H98 O6  | 22.966 | +NH4 |
| TG(18:2,18:2,18:2)  | TG | 18:2/18:2/18:2  | 54:06 | 878.7363 | C57 H98 O6  | 23.479 | +NH4 |
| TG(18:2,20:4,21:5)  | TG | 18:2/20:4/21:5  | 59:11 | 938.7363 | C62 H98 O6  | 18.584 | +NH4 |
| TG(18:2,20:4,22:6)  | TG | 18:2/20:4/22:6  | 60:12 | 950.7363 | C63 H98 O6  | 18.594 | +NH4 |
| TG(18:2p,16:0,18:2) | TG | 18:2p/16:0/18:2 | 52:4p | 838.7414 | C55 H98 O5  | 20.05  | +NH4 |
| TG(18:3,13:0,18:2)  | TG | 18:3/13:0/18:2  | 49:05 | 810.6737 | C52 H90 O6  | 18.325 | +NH4 |
| TG(18:3,14:1,18:2)  | TG | 18:3/14:1/18:2  | 50:06 | 822.6737 | C53 H90 O6  | 18.146 | +NH4 |
| TG(18:3,14:1,18:3)  | TG | 18:3/14:1/18:3  | 50:07 | 820.6581 | C53 H88 O6  | 17.603 | +NH4 |
| TG(18:3,17:2,18:2)  | TG | 18:3/17:2/18:2  | 53:07 | 862.705  | C56 H94 O6  | 18.485 | +NH4 |
| TG(18:3,17:3,18:2)  | TG | 18:3/17:3/18:2  | 53:08 | 860.6894 | C56 H92 O6  | 17.979 | +NH4 |

Supplemental Tables for “Comprehensive untargeted lipidomic analysis using core-shell C30 particle column and high field orbitrap mass spectrometer”, by Mónica Narváez-Rivas and Qibin Zhang, *Journal of Chromatography A*.

|                     |    |                 |       |          |             |        |      |
|---------------------|----|-----------------|-------|----------|-------------|--------|------|
| TG(18:3,18:2,18:2)  | TG | 18:3/18:2/18:2  | 54:07 | 876.7207 | C57 H96 O6  | 16.554 | +NH4 |
| TG(18:3,18:2,18:2)  | TG | 18:3/18:2/18:2  | 54:07 | 876.7207 | C57 H96 O6  | 18.176 | +NH4 |
| TG(18:3,18:2,18:2)  | TG | 18:3/18:2/18:2  | 54:07 | 876.7207 | C57 H96 O6  | 18.765 | +NH4 |
| TG(18:3,18:2,18:2)  | TG | 18:3/18:2/18:2  | 54:07 | 876.7207 | C57 H96 O6  | 19.093 | +NH4 |
| TG(18:3,18:2,18:3)  | TG | 18:3/18:2/18:3  | 54:08 | 874.705  | C57 H94 O6  | 18.301 | +NH4 |
| TG(18:3,18:2,18:3)  | TG | 18:3/18:2/18:3  | 54:08 | 874.705  | C57 H94 O6  | 18.473 | +NH4 |
| TG(18:3,18:2,20:3)  | TG | 18:3/18:2/20:3  | 56:08 | 902.7363 | C59 H98 O6  | 18.901 | +NH4 |
| TG(18:3,18:2,20:4)  | TG | 18:3/18:2/20:4  | 56:09 | 900.7207 | C59 H96 O6  | 18.572 | +NH4 |
| TG(18:3,18:2,20:4)  | TG | 18:3/18:2/20:4  | 56:09 | 900.7207 | C59 H96 O6  | 18.881 | +NH4 |
| TG(18:3,18:2,20:5)  | TG | 18:3/18:2/20:5  | 56:10 | 898.705  | C59 H94 O6  | 18.11  | +NH4 |
| TG(18:3,18:3,18:3)  | TG | 18:3/18:3/18:3  | 54:09 | 872.6894 | C57 H92 O6  | 17.787 | +NH4 |
| TG(18:3,18:3,22:6)  | TG | 18:3/18:3/22:6  | 58:12 | 922.705  | C61 H94 O6  | 17.882 | +NH4 |
| TG(18:4,18:1,18:2)  | TG | 18:4/18:1/18:2  | 54:07 | 876.7207 | C57 H96 O6  | 16.765 | +NH4 |
| TG(18:4,18:2,18:2)  | TG | 18:4/18:2/18:2  | 54:08 | 874.705  | C57 H94 O6  | 17.123 | +NH4 |
| TG(18:4,18:2,18:2)  | TG | 18:4/18:2/18:2  | 54:08 | 874.705  | C57 H94 O6  | 18.669 | +NH4 |
| TG(19:0,18:2,18:2)  | TG | 19:0/18:2/18:2  | 55:04 | 896.7833 | C58 H104 O6 | 20.367 | +NH4 |
| TG(19:2,18:2,18:3)  | TG | 19:2/18:2/18:3  | 55:07 | 890.7363 | C58 H98 O6  | 19.034 | +NH4 |
| TG(20:0e,16:0,18:1) | TG | 20:0e/16:0/18:1 | 54:1e | 874.8353 | C57 H110 O5 | 21.812 | +NH4 |
| TG(20:0e,18:1,18:1) | TG | 20:0e/18:1/18:1 | 56:2e | 900.851  | C59 H112 O5 | 21.772 | +NH4 |
| TG(20:0e,18:2,20:1) | TG | 20:0e/18:2/20:1 | 58:3e | 926.8666 | C61 H114 O5 | 21.825 | +NH4 |
| TG(20:2,18:2,18:2)  | TG | 20:2/18:2/18:2  | 56:06 | 906.7676 | C59 H102 O6 | 19.738 | +NH4 |
| TG(20:3,18:2,22:4)  | TG | 20:3/18:2/22:4  | 60:09 | 956.7833 | C63 H104 O6 | 19.562 | +NH4 |
| TG(20:5,18:2,20:4)  | TG | 20:5/18:2/20:4  | 58:11 | 924.7207 | C61 H96 O6  | 18.353 | +NH4 |
| TG(20:5,18:2,22:6)  | TG | 20:5/18:2/22:6  | 60:13 | 948.7207 | C63 H96 O6  | 18.134 | +NH4 |
| TG(20:5,20:4,20:5)  | TG | 20:5/20:4/20:5  | 60:14 | 946.705  | C63 H94 O6  | 17.619 | +NH4 |
| TG(20:5,20:4,22:6)  | TG | 20:5/20:4/22:6  | 62:15 | 972.7207 | C65 H96 O6  | 17.912 | +NH4 |
| TG(22:0,18:2,18:2)  | TG | 22:0/18:2/18:2  | 58:04 | 938.8302 | C61 H110 O6 | 21.015 | +NH4 |
| TG(22:4,18:2,18:2)  | TG | 22:4/18:2/18:2  | 58:08 | 930.7676 | C61 H102 O6 | 19.434 | +NH4 |

Supplemental Tables for “Comprehensive untargeted lipidomic analysis using core-shell C30 particle column and high field orbitrap mass spectrometer”, by Mónica Narváez-Rivas and Qibin Zhang, *Journal of Chromatography A*.

|                    |    |                |       |          |             |        |      |
|--------------------|----|----------------|-------|----------|-------------|--------|------|
| TG(22:5,18:2,24:6) | TG | 22:5/18:2/24:6 | 64:13 | 1004.783 | C67 H104 O6 | 19.006 | +NH4 |
| TG(24:1,18:2,22:6) | TG | 24:1/18:2/22:6 | 64:09 | 1012.846 | C67 H112 O6 | 20.675 | +NH4 |
| TG(24:1,18:2,23:0) | TG | 24:1/18:2/23:0 | 65:03 | 1038.955 | C68 H126 O6 | 22.316 | +NH4 |
| TG(24:4,18:1,18:2) | TG | 24:4/18:1/18:2 | 60:07 | 960.8146 | C63 H108 O6 | 20.275 | +NH4 |
| TG(26:1,16:0,18:0) | TG | 26:1/16:0/18:0 | 60:01 | 972.9085 | C63 H120 O6 | 22.225 | +NH4 |
| TG(26:1,16:0,24:1) | TG | 26:1/16:0/24:1 | 66:02 | 1054.987 | C69 H130 O6 | 22.725 | +NH4 |
| TG(26:1,18:2,20:4) | TG | 26:1/18:2/20:4 | 64:07 | 1016.877 | C67 H116 O6 | 21.204 | +NH4 |
| TG(27:0,18:2,18:2) | TG | 27:0/18:2/18:2 | 63:04 | 1008.909 | C66 H120 O6 | 21.828 | +NH4 |
| TG(30:1,18:2,18:3) | TG | 30:1/18:2/18:3 | 66:06 | 1046.924 | C69 H122 O6 | 21.773 | +NH4 |
| TG(8:0,18:1,18:2)  | TG | 8:0/18:1/18:2  | 44:03 | 744.6268 | C47 H84 O6  | 17.688 | +NH4 |
| TG(8:0,18:2,18:2)  | TG | 8:0/18:2/18:2  | 44:04 | 742.6111 | C47 H82 O6  | 16.945 | +NH4 |

Cer: ceramide, DG: diacylglycerol, LPC: lysophosphatidylcholine, LPE: lysophosphatidylethanolamine, PC: phosphatidylcholine, PE: phosphatidylethanolamine, PG: phosphatidylglycerol, PI: phosphatidylinositol, PS: phosphatidylserine, SM: sphingomyelin, So: sphingosine, TG: triacylglycerol
